# Fascioliasis and Intestinal Parasitoses Affecting Schoolchildren in Atlixco, Puebla State, Mexico: Epidemiology and Treatment with Nitazoxanide

José Lino Zumaquero-Ríos<sup>1</sup>, Jorge Sarracent-Pérez<sup>2</sup>, Raúl Rojas-García<sup>1</sup>, Lázara Rojas-Rivero<sup>2</sup>, Yaneth Martínez-Tovilla<sup>3</sup>, María Adela Valero<sup>4</sup>, Santiago Mas-Coma<sup>4\*</sup>

**1** Laboratorio de Parasitología y Vectores, Facultad de Biología, Benemérita Universidad Autónoma de Puebla, Ciudad Universitaria, Col. Jardines de San Manuel, Puebla, Puebla, México, **2** Laboratorio de Parasitología, Instituto de Medicina Tropical “Pedro Kouri”, Ciudad de la Habana, Cuba, **3** Servicio de Pediatría, Hospital Universitario de Puebla, Col. Volcanes, Puebla, Puebla, México, **4** Departamento de Parasitología, Facultad de Farmacia, Universidad de Valencia, Burjassot, Valencia, Spain

## Abstract

**Background:** The Atlixco municipality, Puebla State, at a mean altitude of 1840 m, was selected for a study of *Fasciola hepatica* infection in schoolchildren in Mexico. This area presents permanent water collections continuously receiving thaw water from Popocatepetl volcano (5426 m altitude) through the community supply channels, conforming an epidemiological scenario similar to those known in hyperendemic areas of Andean countries.

**Methodology and Findings:** A total of 865 6–14 year-old schoolchildren were analyzed with FasciDIG coproantigen test and Lumbreras rapid sedimentation technique, and quantitatively assessed with Kato-Katz. Fascioliasis prevalences ranged 2.94–13.33% according to localities (mean 5.78%). Intensities were however low (24–384 epg). The association between fascioliasis and the habit of eating raw vegetables was identified, including watercress and radish with pronouncedly higher relative risk than lettuce, corn cob, spinach, alfalfa juice, and broccoli. Many *F. hepatica*-infected children were coinfecting by other parasites. *Entamoeba histolytica/dispar*, *Giardia intestinalis*, *Blastocystis hominis*, *Hymenolepis nana* and *Ascaris lumbricoides* infection resulted in risk factors for *F. hepatica* infection. Nitazoxanide efficacy against fascioliasis was 94.0% and 100% after first and second treatment courses, respectively. The few children, for whom a second treatment course was needed, were concomitantly infected by moderate ascariasis burdens. Its efficacy was also very high in the treatment of *E. histolytica/E. dispar*, *G. intestinalis*, *B. hominis*, *H. nana*, *A. lumbricoides*, *Trichuris trichiura*, and *Enterobius vermicularis*. A second treatment course was needed for all children affected by ancylostomatids.

**Conclusions:** Fascioliasis prevalences indicate this area to be mesoendemic, with isolated hyperendemic foci. This is the first time that a human fascioliasis endemic area is described in North America. Nitazoxanide appears as an appropriate alternative to triclabendazole, the present drug of choice for chronic fascioliasis. Its wide spectrum efficacy against intestinal protozooses and helminthiasis, usually coinfecting liver fluke infected subjects in human endemic areas, represents an important added value.

**Citation:** Zumaquero-Ríos JL, Sarracent-Pérez J, Rojas-García R, Rojas-Rivero L, Martínez-Tovilla Y, et al. (2013) Fascioliasis and Intestinal Parasitoses Affecting Schoolchildren in Atlixco, Puebla State, Mexico: Epidemiology and Treatment with Nitazoxanide. PLoS Negl Trop Dis 7(11): e2553. doi:10.1371/journal.pntd.0002553

**Editor:** Timothy G. Geary, McGill University, Canada

**Received:** April 14, 2013; **Accepted:** October 8, 2013; **Published:** November 21, 2013

**Copyright:** © 2013 Zumaquero-Ríos et al. This is an open-access article distributed under the terms of the Creative Commons Attribution License, which permits unrestricted use, distribution, and reproduction in any medium, provided the original author and source are credited.

**Funding:** Joint coordination activities carried out within Project No. RLA5049 of the International Atomic Energy Agency (Animal Production and Health Section, Joint FAO/IAEA Division of Nuclear Techniques in Food and Agriculture, Department of Nuclear Sciences and Applications, IAEA Headquarters Vienna, Austria). Products needed for the FasciDIG test provided by the Instituto de Medicina Tropical “Pedro Kouri”, La Habana, Cuba, and by the Instituto Nacional de Diagnóstico y Referencia Epidemiológicos (INDRE) of Mexico. Collaboration by the Department of Parasitology of the University of Valencia, Spain, funded by Projects No. SAF2006-09278 and No. SAF2010-20805 of the Ministry of Economy and Competitiveness, Madrid, and by the Red de Investigación de Centros de Enfermedades Tropicales – RICET (Projects No. ISCIII-RETIC RD06/0021/0017 and RD12/0018/0013 of the Programa de Redes Temáticas de Investigación Cooperativa RETICS/FEDER), FIS, Ministry of Health, Madrid, Spain. The content is solely the responsibility of the authors and does not necessarily represent the official views of the funding and supporting agencies. The funders had no role in study design, data collection and analysis, decision to publish, or preparation of the manuscript.

**Competing Interests:** The authors have declared that no competing interests exist.

\* E-mail: S.Mas.Coma@uv.es

## Introduction

Fascioliasis is a parasitic disease caused by two liver fluke species: *Fasciola hepatica* of almost global distribution due to the very large presence of their specific lymnaeid snail vectors, and *F. gigantica* only in Africa and Asia due to the distribution of their specific snail vectors restricted to these two continents [1]. The

high pathogenicity of this disease is well known in livestock since long ago [2], despite of which it was only considered a secondary disease in humans due to the number of only around 2500 reported cases before the 90 s [3]. The scenario began to change from that decade, due to the description of large endemic areas including even human hyperendemic situations in countries such as Bolivia [4], Peru [5,6], Egypt [7], Iran [8,9] and others.

## Author Summary

A human fascioliasis endemic area is described for the first time in North America. In Atlixco, Puebla State, Mexico, prevalences of 2.94–13.33% by *F. hepatica* were found in 865 6–14-year-old schoolchildren by FasciDIG coproantigen test and Lumbreras rapid sedimentation technique, and quantitatively assessed with Kato-Katz. Prevalences peaked in the 8–10-year age group. The use of a coproantigen test proved to be useful, as most children (72%) did not shed eggs. The link of fascioliasis risk with consumption of raw vegetables other than watercress suggests contamination when washing terrestrial vegetables with untreated water and/or in plant cultures using natural water for irrigation. The relatively high coinfection percentage with *Giardia intestinalis* and the lack of a treated water supply system reaching all dwellings suggest that infection may also occur by water drinking. Nitazoxanide efficacy against fascioliasis is worth mentioning, becoming an alternative to triclabendazole. Its wide spectrum against intestinal protozooses and helminthiasis, usually coinfecting *Fasciola* infected subjects in human endemic areas, represents an important added value. In Atlixco, the low fascioliasis intensities indicate that no special precaution will be needed for child treatment (epg<400). The mesoendemic situation, with hyperendemic foci, adds concern about possible human fascioliasis underestimation in other areas of Mexico.

The high prevalences and intensities detected in several human endemic areas, mainly affecting children and females, together with the increase of human reports in numerous countries, conform an emerging scenario. This new worldwide situation is not always understandable by only considering the higher performance of the present diagnostic techniques, even taking into account up to which level this disease was in need for an update even on fundamental aspects such as the etiological coprological diagnostics in both human and animals [10]. The origin of fascioliasis emergence in recent years has been argued to be related to climate change, at least in part and in given countries [11], as a consequence of the high dependence of fascioliasis transmission on climate and environmental characteristics [12,13]. This new worrying scenario has forced many multidisciplinary studies, including results showing old misunderstandings due to the simple extrapolation of knowledge about animal fascioliasis to human fascioliasis [1,10,14].

The increasing importance of human fascioliasis additionally relies on the results of pathogenicity and immunity studies, according to which this disease appears to be pronouncedly more complicated and with a greater impact in long-term infection than what was believed until the 90 s [15–18]. Emergence, long-term pathogenicity and immunological interactions are in the background of the decision taken by WHO to include this disease within the so-called neglected tropical diseases (NTDs), a group of chronic, debilitating, and poverty-promoting, which are among the most common causes of illness of the poorest people living in developing countries. Their control and elimination is now recognized as a priority for achieving United Nations Millennium Development Goals and targets for sustainable poverty reduction [19,20].

In the Americas, fascioliasis is caused by only *F. hepatica* mainly transmitted by lymnaeid snail vectors of the *Galba/Fossaria* group [21] and distributed throughout, from Canada in the North up to Chile and Argentina in the South [1]. Although human fascioliasis cases have been reported from many Latin American countries,

areas of high human impact described in the last two decades focus on Andean countries, mainly in high altitude areas where fascioliasis transmission is increased as a consequence of the adaptation of both liver fluke and lymnaeid vectors to the extreme environmental conditions [22]. Contrary to South America, no serious public health situation due to human fascioliasis has been reported in Central America and North America so far.

In Mexico, human infection by *Fasciola* was noted to be sporadic, with only up to fifty cases reported until the second half of the 20th century [23] including the first human cases described in Atlixco, Puebla State [24]. Human cases were reported from the states of México, Veracruz, Tabasco, Chiapas Hidalgo, Morelos, Oaxaca, San Luis Potosi and Sinaloa, with the state of Puebla as the one in which human reports were more frequent [23]. Unfortunately, the question is posed on the real situation of human fascioliasis in Mexico nowadays, due to (i) the fact that this disease is of no obligatory declaration, (ii) the lack of appropriate surveys in areas of poverty and high animal infection, and (iii) the well-known fact of rural children not usually attending hospitals for diagnosis.

The aim of the present study is to report relatively high infection prevalences by *F. hepatica* obtained in a survey of schoolchildren in localities of the Atlixco municipality. The area selected present characteristics a priori favorable for human infection, including livestock infection, presence of lymnaeids belonging to *Galba/Fossaria*, altitude and adequate freshwater collections for transmission. Objectives were the epidemiological description of the fascioliasis situation, assess potential food and drinking infection sources in the area, analyze coinfections of fascioliasis with other intestinal parasitic infections, ascertain the impact of fascioliasis on child nutritional status, and verify the usefulness of nitazoxanide for human chronic fascioliasis treatment as an alternative to the actual drug of choice, triclabendazole for human use, unfortunately not easily available everywhere in Latin America. Results obtained enable us to describe a human fascioliasis endemic area in the New World for the first time outside South America, and pose an important question mark about the numerous rural areas of Mexico presenting similar socio-economic, climatic and environmental characteristics.

## Materials and Methods

### Ethics statement

This study was approved by the Comisión de Bioética of the Hospital Universitario de la Benemérita Universidad Autónoma de Puebla, Puebla, Mexico. Samples from children were obtained after consent from the children's parents, following the principles expressed in the Declaration of Helsinki. The consent from the parent's of the children was written and informed. Consent was also obtained from the local authorities of the Atlixco municipality, as well as from heads and teachers of the schools. At the end of the survey, all children who were diagnosed to be infected by the liver fluke and/or any other parasite species received appropriate treatment with nitazoxanide.

### Study areas

A total of 865 stool samples from 6–14-year-old children from ten rural schools covering ten different localities of Atlixco municipality were studied: San Esteban Zoapiltepec, San Jerónimo Caleras, Huilotepec, Almazán, Tenextepec, Altavista, San Juan Castillota, Juan Uvera, La Trinidad Tepango, and San Felipe Xonacayucan. Atlixco municipality (18°49'30"–18°58'30"N; 98°18'24"–98°33'36"W) is located in the State of Puebla, at the centre-south of the country of Mexico (Fig. 1) and

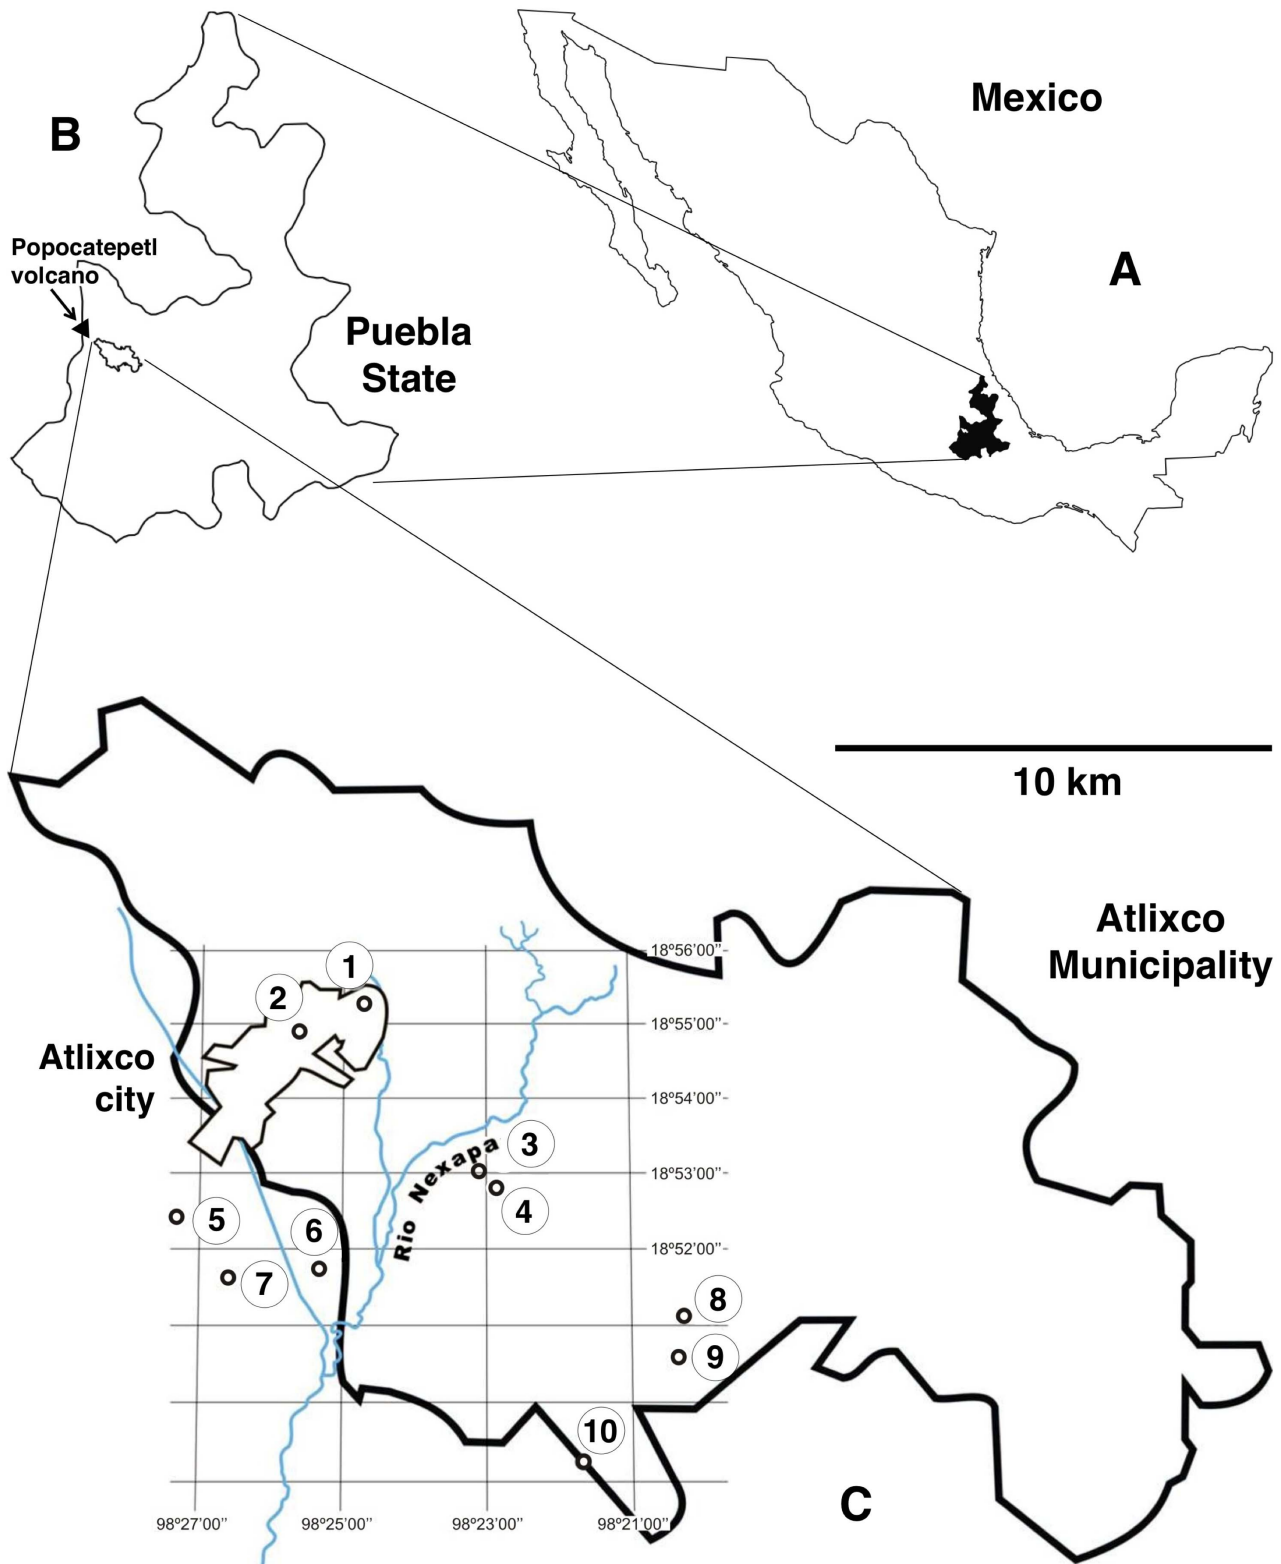

**Figure 1. Maps showing the geographical distribution of localities surveyed in Atlixco municipality, Puebla, Mexico.** A) Map of Mexico; B) Map of Puebla State; C) Map of Atlixco municipality showing Atlixco city and localities of the schools surveyed: 1 = Tenextepec; 2 = Alta Vista; 3 = Almazán; 4 = Huilotepec; 5 = San Juan Casstillotla; 6 = Juan Uvera; 7 = La Trinidad Tepango; 8 = San Felipe Xonacayucan; 9 = San Jerónimo Caleras; 10 = San Esteban Zoapiltepec.  
doi:10.1371/journal.pntd.0002553.g001

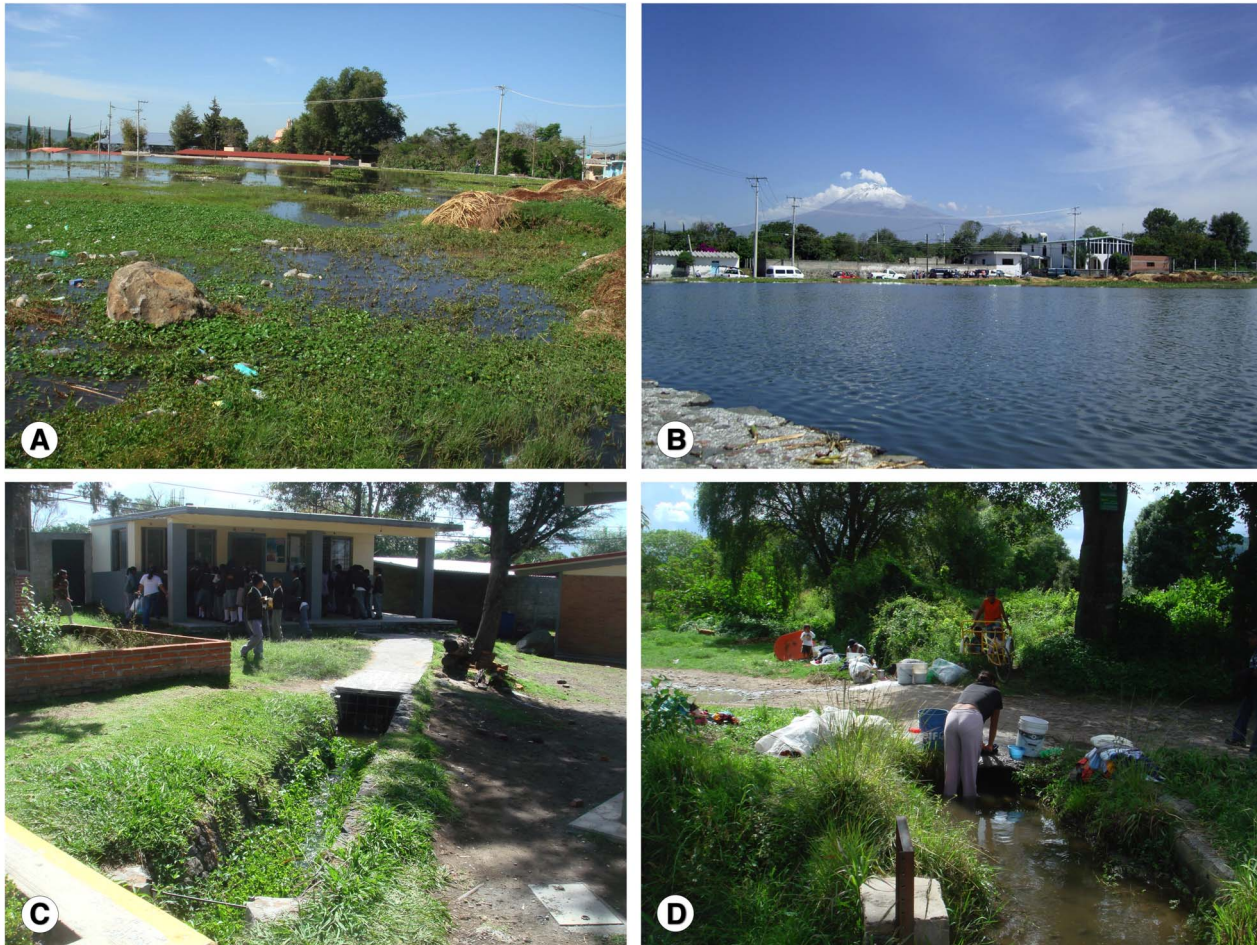

**Figure 2. Human fascioliasis transmission and epidemiology in Atlixco municipality, Puebla, Mexico.** A) permanent water collection inhabited by freshwater lymnaeid snails, just in front of school (note red school roof in the background); B) permanent water collection inhabited by freshwater lymnaeid snails showing nearby snow-capped Popocatepetl volcano in the background; C) water channel inside school playground with water coming from outside pond illustrated in A; D) women washing in water channel inhabited by lymnaeid vectors, accompanied by small children. doi:10.1371/journal.pntd.0002553.g002

has a population of 122,149 inhabitants (2005 census). Atlixco city is at an altitude of 1840 m, similarly as all other localities surveyed.

The area comprising the aforementioned ten localities includes large surfaces devoted to livestock ranching and also free grazing. Sheep and goat breeding for feeding purposes is an important activity in that area. Inhabitants are also known because of watercress consumption and drinking of a beverage made from alfalfa (*Medicago sativa*), a plant raised throughout large surfaces for the feeding of ranches in Chipilo, another locality of the State of Puebla. These alfalfa crop surfaces are irrigated with water from zones presenting *F. hepatica*-infected livestock.

Zones where surveyed schools are located present different kinds of nearby permanent water collections inhabited by high densities of lymnaeid snail species belonging to the *Galba/Fossaria* vector group (Gastropoda: Lymnaeidae) [25,26] (Fig. 2). These natural water collections are continuously receiving thaw water from the relatively close Popocatepetl volcano (the second highest peak in Mexico, with 5426 m altitude, containing glaciers and located only at 22 km northwest from Atlixco city) through the community supply channels. Temperatures around 25–28°C favor lymnaeid population development during many year periods [27].

The surveys were made at random on a given day among all participating students, and the sample size in each school was

representative of both the student enrollment in the school and the number of children present on the day of the survey (at least 95%). The 865 children surveyed represent the 93.91% of the total schoolchildren in the aforementioned ten rural schools.

#### Stool collection and laboratory methods

The nature of the study was explained to the children, who then were asked to try to pass a small volume of their own faeces into a clean 30-ml plastic, widemouthed, numerated container with snap-on lid. Personal data (name, sex, and age) were taken from school records on delivery of the container. Faecal specimens, one by each student, were transported to the laboratory within the following 6 hours. Three different diagnostic techniques were applied to each stool sample:

- the rapid sedimentation procedure [28] was used for a first analysis of the faecal samples, as it has already shown its usefulness for human samples [29]; for protozoans, coloration with eosine and lugol at 1% was applied to sediments and direct smears to facilitate detection and identification; differentiation between *Entamoeba histolytica* and *E. dispar* stages, as well as between eggs of *Necator americanus* and *Ancylostoma*

*duodenale*, respectively most prevalent and relatively rare but anyway widely distributed in Mexico [30], was not made;

- a Kato-Katz cellophane faecal thick-smear technique was made following WHO recommendations, using a template delivering about 41.7 mg of faeces [31]. Slides were initially examined within one hour of preparation to avoid over-clarification of some helminth eggs. The Kato-Katz slides were analysed for the egg counts. Intensity of infection, measured as eggs per gram of faeces (epg) was used as an indicator of *F. hepatica* burden in the infected subjects to assess whether special precautions should be taken in the treatment of heavily infected children, according to WHO instructions [32];
- the FasciDIG capture ELISA test for fascioliasis diagnosis detects excretory-secretory antigens (ESAs) in faeces [33,34]. This coproantigen test has already been proved to be useful for the diagnosis of human fascioliasis [35,36]. Technical procedures were made following the commercial protocol. An optical density of  $\geq 0.24$  at 492 nm was considered positive.

### Surveys on food and drinking habits

In order to assess the potential liver fluke metacercarial sources for child infection, two questionnaires, including information about (i) vegetable consumption by the children and (ii) water sources at home, were filled by the same pollster person. Answers from 815 schoolchildren (among the 865 from whom the stool samples were afterwards collected) and from 321 parents (living in the ten localities where schoolchildren were surveyed) were obtained, respectively.

Relative risks (RR) were estimated using a multivariate logistic regression [in the context of risk factors, the resulting Exp(B) are estimates of RR]. An RR higher than 1 was considered to be significant. The correlation of RR of having fascioliasis with consumption of the most frequent vegetables within the local diet (broccoli, spinach, lettuce, radish, rice, corn cob, flat maize pancake, beans, alfalfa juice, watercress and watercress plus potato pancake) were studied by multivariate logistic regression analysis (PASW Statistics 17). Results were considered statistically significant when  $P < 0.05$ . Two models (Models 1–2) were used in the multivariate logistic regression analysis including presence/absence of fascioliasis as dependent variable. Model 1 included consumption of raw vegetables (broccoli, spinach, lettuce, radish, corn cob, alfalfa juice and watercress) as independent variables. Model 2 included consumption of cooked vegetables (rice, flat maize pancake, beans and watercress plus potato pancake) as independent variables.

### Child treatment

Children diagnosed as positive to liver fluke infection and/or to intestinal protozoans and helminths were treated with a course of nitazoxanide of 7.5 mg/kg of body weight each 12 hours (in breakfast and dinner) during seven days. This dose was considered adequate to treat the different protozooses and helminthiasis found and the low intensities of the latter, according to the instructions of the medicinal product manufacturer. Post-treatment follow-up was made weekly until disappearance of parasite stages in stools, including blood testing focusing on eosinophilia and anaemia, and additionally negativization of coproantigen test results in the case of fascioliasis, for which a second treatment course was needed only in a relatively few cases.

Nitazoxanide is a thiazolide derivative, a pyruvate ferredoxin oxidoreductase inhibitor with reported efficacy on a broad parasitological spectrum, such as intestinal protozoans and helminths,

including fascioliasis. It is given by the oral route with good bioavailability and is well tolerated, with primarily mild gastrointestinal side effects. The US Food and Drug Administration (FDA) approved nitazoxanide in 2002 for the treatment of diarrhea caused by *Cryptosporidium* species and *Giardia intestinalis* in pediatric patients 1–11 years of age, and in 2004 for its use in adults [37–40]. This drug has already been successfully used against intestinal protozoan and helminthic infections in Mexico [41–43] as well as in many countries [44].

### Data management and statistical analysis

Statistical analyses were done using SPSS version 15.0. For the evaluation of categorical variables, the chi-square test or Fisher's exact test was used. Odds ratio (OR), 95% confidence intervals and P-values were calculated. Subsequently, stepwise conditional logistic regression was used to determine independent potential risk factors associated with *F. hepatica* infection or *F. hepatica* egg presence in faeces. Associations between *F. hepatica* infection and other parasite species were investigated by  $2 \times 2$  contingency tables, from which the chi-square statistic was calculated. A P value less than 0.05 was considered statistically significant.

## Results

### Infection analyses

Result on liver fluke infection according to gender and age groups are noted in Tables 1 and 2. Prevalences by *F. hepatica* ranged between a minimum of 2.9% found in the locality of Juan Uvera and a maximum of 13.3% in the locality of San Jerónimo Caleras, with a mean prevalence of 5.8% for the whole area. No significant differences according to localities appeared.

A total of 50 children (28 males and 22 females) were found positive to the coproantigen test, whereas only 14 of them (6 males and 8 females) were shedding eggs in stools. Intensities were always low, between 24 and 384 epg (Table 1). Children infected by the liver fluke were more numerous among the 8–10-year age group ( $n = 27$ ), followed by the 6–7-year age group ( $n = 15$ ) and finally the 11–14-year age group ( $n = 8$ ) (Table 2). No significant differences according to gender or age group appeared.

Results from the answers obtained by means of the questionnaire on vegetable consumption habits of the children are shown in Table 3. Among the different foods examined by multivariate logistic regression analysis, several appeared to be significantly associated with *F. hepatica* infection with increased risk. The association between fascioliasis and the habit of eating raw vegetables was identified, including from more to less risk as follows: watercress (RR = 2250.16) and radish (RR = 675.36) with pronouncedly higher relative risk than lettuce (RR = 56.58), corn cob (RR = 31.26), spinach (RR = 16.615), alfalfa juice (RR = 9.51), and broccoli (RR = 7.881).

With regard to water sources at home, answers furnished by parents of the same localities referred to aqueduct (48.87%), pond or water ditch (25.00%), well (22.75%), water tank (2.70%), and channel (0.68%). Combined sources (use of two or more water sources in the same house) was noted in 34.46%. Additionally, during field work, children were sometimes observed to bath, defaecate and urinate in different water collections after leaving school.

Additionally to *F. hepatica*, three protozoan and five helminth species were found: *E. histolytica*/*E. dispar*, *Giardia intestinalis* and *Blastocystis hominis*, *Hymenolepis nana*, *Ascaris lumbricoides*, *Trichuris trichiura*, *Ancylostomatidae* spp., and *Enterobius vermicularis*. Total prevalences of these parasitic infections and respective distributions according to localities and gender are

**Table 1.** Sex distribution of *Fasciola hepatica* infection detected in the 865 6–14-year-old schoolchildren analyzed from the localities surveyed in Atlixco municipality, Puebla State, Mexico, according to the different diagnostic techniques applied.

| Localities              | Schools                   | Number of subjects studied |       | Number of positive by FasciDIG test |      |       | Number of positive by Lumbreras technique |      |       | Number of positive by Kato-Katz technique |      |       | Eggs/g of faeces by Kato-Katz | Range values |
|-------------------------|---------------------------|----------------------------|-------|-------------------------------------|------|-------|-------------------------------------------|------|-------|-------------------------------------------|------|-------|-------------------------------|--------------|
|                         |                           | Boys                       | Girls | Total                               | Boys | Girls | Total                                     | Boys | Girls | Total                                     | Boys | Girls |                               |              |
| San Esteban Zoapiltepec | Ignacio Manuel Altamirano | 72                         | 33    | 105                                 | 1    | 3     | 4                                         | 0    | 2     | 2                                         | 0    | 2     | 2                             | 240 epg      |
| San Jerónimo Caleras    | Juventino Rosas           | 38                         | 22    | 60                                  | 5    | 3     | 8                                         | 1    | 3     | 4                                         | 1    | 3     | 4                             | 120–288 epg  |
| Huilotepic              | José María Morelos        | 42                         | 28    | 70                                  | 1    | 2     | 3                                         | 0    | 2     | 2                                         | 0    | 2     | 2                             | 48–240 epg   |
| Almazán                 | Valerio Trujano           | 32                         | 17    | 49                                  | 3    | 0     | 3                                         | 0    | 0     | 0                                         | 0    | 0     | 0                             | 0            |
| Tenextepic              | Melchor Ocampo            | 27                         | 26    | 53                                  | 2    | 0     | 2                                         | 1    | 0     | 1                                         | 1    | 0     | 1                             | 240 epg      |
| Altavista               | Ignacio Zaragoza          | 116                        | 119   | 235                                 | 9    | 6     | 15                                        | 1    | 0     | 4                                         | 1    | 0     | 1                             | 384 epg      |
| San Juan Castillotla    | Simón Bolívar             | 29                         | 28    | 57                                  | 2    | 1     | 3                                         | 0    | 0     | 0                                         | 0    | 0     | 0                             | 0            |
| Juan Uvera              | Aquiles Serdán            | 66                         | 36    | 102                                 | 1    | 2     | 3                                         | 1    | 0     | 1                                         | 1    | 0     | 1                             | 48 epg       |
| La Trinidad Tepango     | Alvaro Obregón            | 31                         | 20    | 51                                  | 3    | 3     | 6                                         | 2    | 1     | 3                                         | 2    | 1     | 3                             | 48–120 epg   |
| San Felipe Xonacayucan  | Aquiles Serdán            | 28                         | 55    | 83                                  | 1    | 2     | 3                                         | 0    | 0     | 0                                         | 0    | 0     | 0                             | 0            |
| TOTAL                   |                           | 481                        | 384   | 865                                 | 28   | 22    | 50                                        | 6    | 8     | 14                                        | 6    | 8     | 14                            | 24–384 epg   |

doi:10.1371/journal.pntd.0002553.t001

**Table 2.** Age distribution of *Fasciola hepatica* infection detected in the 865 6–14-year-old schoolchildren analyzed from the localities surveyed in Atlixco municipality, Puebla State, Mexico.

| Age (years) | San Esteban Zoapiltepec |     | San Jerónimo Caleras |     | Huitotepec |      | Almazán |   | Tenexztepec |     | Altavista |     | San Juan Castillota |    | Juan Uvera |     | La Trinidad Tepango |      | San Felipe Xonacayucan |    | Total |     |    |      |      |   |      |     |     |     |      |    |     |
|-------------|-------------------------|-----|----------------------|-----|------------|------|---------|---|-------------|-----|-----------|-----|---------------------|----|------------|-----|---------------------|------|------------------------|----|-------|-----|----|------|------|---|------|-----|-----|-----|------|----|-----|
|             | N                       | %   | N                    | %   | N          | %    | N       | % | N           | %   | N         | %   | N                   | %  | N          | %   | N                   | %    | N                      | %  | N     | %   |    |      |      |   |      |     |     |     |      |    |     |
| 6           | 15                      | 6.7 | 6                    | 0.0 | 26         | 1    | 3.8     | 5 | 0           | 0.0 | 7         | 1   | 14.3                | 31 | 3          | 9.7 | 13                  | 0    | 0.0                    | 18 | 1     | 5.6 | 10 | 1    | 10.0 | 1 | 1    | 100 | 132 | 9   | 6.8  |    |     |
| 7           | 13                      | 0   | 0.0                  | 8   | 0          | 0.0  | 24      | 0 | 0.0         | 8   | 0         | 0.0 | 31                  | 3  | 9.7        | 7   | 0                   | 0.0  | 17                     | 2  | 11.8  | 7   | 1  | 14.3 | 6    | 0 | 0.0  | 127 | 6   | 4.7 |      |    |     |
| 8           | 14                      | 1   | 7.1                  | 8   | 3          | 37.5 | 20      | 2 | 10.0        | 7   | 0         | 0.0 | 24                  | 2  | 8.3        | 7   | 0                   | 0.0  | 16                     | 0  | 0.0   | 9   | 0  | 0.0  | 9    | 0 | 0.0  | 20  | 0   | 0.0 | 131  | 8  | 6.1 |
| 9           | 24                      | 1   | 4.2                  | 10  | 2          | 20.0 | –       | – | –           | –   | –         | –   | 37                  | 3  | 8.1        | 5   | 0                   | 0.0  | 8                      | 0  | 0.0   | 11  | 2  | 18.2 | 26   | 1 | 3.8  | 136 | 10  | 7.4 |      |    |     |
| 10          | 24                      | 1   | 4.2                  | 10  | 2          | 20.0 | –       | – | –           | –   | –         | –   | 24                  | 2  | 8.3        | 4   | 0                   | 0.0  | 6                      | 0  | 0.0   | 5   | 2  | 40.0 | 31   | 1 | 3.2  | 115 | 9   | 7.8 |      |    |     |
| 11          | 10                      | 0   | 0.0                  | 5   | 0          | 0.0  | –       | – | –           | –   | –         | –   | 34                  | 2  | 5.9        | 6   | 0                   | 0.0  | 8                      | 0  | 0.0   | 4   | 0  | 0.0  | 6    | 0 | 0.0  | 93  | 4   | 4.3 |      |    |     |
| 12          | 5                       | 0   | 0.0                  | 13  | 1          | 7.7  | –       | – | –           | –   | –         | –   | 50                  | 0  | 0.0        | 11  | 2                   | 18.2 | 10                     | 0  | 0.0   | 5   | 0  | 0.0  | 12   | 0 | 0.0  | 123 | 3   | 2.4 |      |    |     |
| 13          | –                       | –   | –                    | –   | –          | –    | –       | – | –           | –   | –         | –   | 3                   | 0  | 0.0        | 3   | 0                   | 0.0  | –                      | –  | –     | –   | –  | –    | –    | – | –    | –   | 6   | 0   | 0.0  |    |     |
| 14          | –                       | –   | –                    | –   | –          | –    | –       | – | –           | –   | –         | –   | 1                   | 0  | 0.0        | 1   | 1                   | 100  | –                      | –  | –     | –   | –  | –    | –    | – | –    | –   | 2   | 1   | 50.0 |    |     |
| TOTAL       | 105                     | 4   | 3.8                  | 60  | 8          | 13.3 | 70      | 3 | 4.3         | 49  | 3         | 6.1 | 53                  | 2  | 3.8        | 235 | 15                  | 6.4  | 57                     | 3  | 5.3   | 83  | 3  | 3.6  | 51   | 6 | 11.8 | 102 | 3   | 2.9 | 865  | 50 | 5.8 |

N = total studied; + = total infected; % = prevalence.  
doi:10.1371/journal.pntd.0002553.t002

**Table 3.** Results of multivariate logistic regression analysis of vegetable food habits of children, potentially related to fascioliasis transmission and human fascioliasis and regression coefficients [Exp(B) = RR = relative risk] with significance in different models.

| Vegetable consumption          | Questionnaire positive answers in total children |       | Questionnaire positive answers in children by FasciDIG |       | Questionnaire positive answers in children shedding <i>Fasciola</i> eggs |       | Model 1     |              | Model 2     |              |
|--------------------------------|--------------------------------------------------|-------|--------------------------------------------------------|-------|--------------------------------------------------------------------------|-------|-------------|--------------|-------------|--------------|
|                                | answers among 815 children                       | %     | answers among 50 children                              | %     | answers among 14 children                                                | %     | Coefficient | Significance | Coefficient | Significance |
| Broccoli                       | 13                                               | 1.60  | 6                                                      | 12.00 | 2                                                                        | 14.28 | 7.881       | 0.624        |             |              |
| Spinach                        | 18                                               | 2.21  | 4                                                      | 8.00  | 0                                                                        | 0     | 16.615      | 0.193        |             |              |
| Lettuce                        | 39                                               | 4.79  | 17                                                     | 34.00 | 5                                                                        | 35.71 | 56.58       | 0.002        |             |              |
| Radish                         | 130                                              | 15.95 | 41                                                     | 82.00 | 9                                                                        | 64.28 | 675.36      | <0.001       |             |              |
| Rice                           | 766                                              | 93.99 | 23                                                     | 46.00 | 6                                                                        | 42.86 |             |              | 0.005       | <0.001       |
| Corncob                        | 340                                              | 41.72 | 42                                                     | 84.00 | 14                                                                       | 100   | 31.26       | 0.005        |             |              |
| Flat maize pancake             | 815                                              | 100   | 48                                                     | 96.00 | 13                                                                       | 92.86 |             |              | <0.001      | 1.000        |
| Beans                          | 757                                              | 92.88 | 50                                                     | 100   | 14                                                                       | 100   |             |              | 1.136       | 0.711        |
| Alfalfa juice                  | 262                                              | 32.15 | 43                                                     | 86.00 | 13                                                                       | 92.86 | 9.51        | 0.073        |             |              |
| Watercress                     | 97                                               | 11.90 | 47                                                     | 94.00 | 13                                                                       | 92.86 | 2250.16     | <0.001       |             |              |
| Watercress plus potato pancake | 591                                              | 72.52 | 50                                                     | 100   | 14                                                                       | 100   |             |              | 1.162       | 0.992        |

Two models (Models 1–2) were used in the multivariate logistic regression analysis including presence/absence of fascioliasis as dependent variable:

– Model 1 including consumption of broccoli, spinach, lettuce, radish, corncob, alfalfa juice and watercress as independent variables.

– Model 2 including consumption of rice, flat maize pancake, beans and watercress & potato pancake as independent variables.

doi:10.1371/journal.pntd.0002553.t003



**Table 4.** Prevalences of parasite species detected in the schoolchildren surveyed in the Atlixco municipality, Puebla, Mexico, according to localities and gender.

| Localities              | Schools                           | Gender | <i>E. histolytica/dispar</i> |      | <i>G. intestinalis</i> |      | <i>B. hominis</i> |      | <i>F. hepatica</i> |     | <i>H. nana</i> |     | <i>A. lumbricoides</i> |   | <i>T. trichiura</i> |   | Ancylostomatidae |   | <i>E. vermicularis</i> | %* |      |
|-------------------------|-----------------------------------|--------|------------------------------|------|------------------------|------|-------------------|------|--------------------|-----|----------------|-----|------------------------|---|---------------------|---|------------------|---|------------------------|----|------|
|                         |                                   |        | %                            | %    | %                      | %    | %                 | %    | %                  | %   | %              | %   | %                      | % | %                   | % | %                | % |                        |    |      |
| San Esteban Zoapiltepec | Ignacio Manuel Altamirano n = 105 | Boys   | 5.6                          | 2.8  | 0.0                    | 1.4  | 1.4               | 12.5 | 6.9                | 2.8 | 1.4            |     |                        |   |                     |   |                  |   |                        |    | 1.4  |
|                         |                                   | Girls  | 6.1                          | 0.0  | 3.0                    | 9.1  | 3.0               | 15.2 | 0.0                | 0.0 | 0.0            | 0.0 |                        |   |                     |   |                  |   |                        |    | 0.0  |
|                         |                                   | total  | 5.8                          | 1.9  | 1.0                    | 3.8  | 1.9               | 13.3 | 4.8                | 1.9 | 0.0            | 0.0 |                        |   |                     |   |                  |   |                        |    | 1.0  |
| San Jerónimo Caleras    | Juventino Rosas n = 60            | Boys   | 5.3                          | 7.9  | 2.6                    | 13.2 | 2.6               | 36.8 | 13.2               | 0.0 | 0.0            |     |                        |   |                     |   |                  |   |                        |    | 7.9  |
|                         |                                   | Girls  | 18.2                         | 13.6 | 4.5                    | 13.6 | 4.5               | 27.3 | 18.2               | 0.0 | 0.0            |     |                        |   |                     |   |                  |   |                        |    | 0.0  |
|                         |                                   | total  | 10.0                         | 10.0 | 3.3                    | 13.3 | 3.3               | 33.3 | 15.0               | 0.0 | 0.0            |     |                        |   |                     |   |                  |   |                        |    | 5.0  |
| Huiloitepec             | José María Morelos n = 70         | Boys   | 7.1                          | 7.1  | 0.0                    | 2.4  | 0.0               | 11.9 | 2.4                | 7.1 | 0.0            |     |                        |   |                     |   |                  |   |                        |    | 7.1  |
|                         |                                   | Girls  | 7.1                          | 14.3 | 0.0                    | 7.1  | 10.7              | 21.4 | 3.6                | 3.6 | 0.0            |     |                        |   |                     |   |                  |   |                        |    | 3.6  |
|                         |                                   | total  | 7.1                          | 10.0 | 0.0                    | 4.3  | 4.3               | 15.7 | 2.9                | 5.7 | 0.0            |     |                        |   |                     |   |                  |   |                        |    | 5.7  |
| Almazán                 | Valerio Trujano n = 49            | Boys   | 12.5                         | 0.0  | 0.0                    | 9.4  | 3.1               | 18.8 | 3.1                | 0.0 | 0.0            |     |                        |   |                     |   |                  |   |                        |    | 6.3  |
|                         |                                   | Girls  | 17.6                         | 11.8 | 0.0                    | 0.0  | 0.0               | 11.8 | 17.6               | 0.0 | 0.0            |     |                        |   |                     |   |                  |   |                        |    | 0.0  |
|                         |                                   | total  | 14.3                         | 4.1  | 0.0                    | 6.1  | 2.0               | 16.3 | 8.2                | 0.0 | 0.0            |     |                        |   |                     |   |                  |   |                        |    | 4.1  |
| Tenextepec              | Melchor Ocampo n = 53             | Boys   | 7.4                          | 14.8 | 7.4                    | 7.4  | 0.0               | 29.6 | 18.5               | 7.4 | 0.0            |     |                        |   |                     |   |                  |   |                        |    | 11.1 |
|                         |                                   | Girls  | 11.5                         | 11.5 | 0.0                    | 0.0  | 7.7               | 26.9 | 26.9               | 3.8 | 0.0            |     |                        |   |                     |   |                  |   |                        |    | 7.7  |
|                         |                                   | total  | 9.4                          | 13.2 | 3.8                    | 3.8  | 3.8               | 28.3 | 22.6               | 5.7 | 0.0            |     |                        |   |                     |   |                  |   |                        |    | 9.4  |
| Altavista               | Ignacio Zaragoza n = 235          | Boys   | 6.0                          | 3.4  | 0.9                    | 7.8  | 0.9               | 32.8 | 8.0                | 0.0 | 0.0            |     |                        |   |                     |   |                  |   |                        |    | 1.7  |
|                         |                                   | Girls  | 5.9                          | 5.0  | 0.0                    | 5.0  | 0.0               | 18.5 | 6.7                | 0.8 | 0.0            |     |                        |   |                     |   |                  |   |                        |    | 2.5  |
|                         |                                   | total  | 6.0                          | 4.3  | 0.4                    | 6.4  | 0.4               | 25.5 | 7.3                | 0.4 | 0.0            |     |                        |   |                     |   |                  |   |                        |    | 2.1  |
| San Juan Castillota     | Simón Bolívar n = 57              | Boys   | 24.1                         | 28.6 | 0.0                    | 6.9  | 0.0               | 41.4 | 24.1               | 6.9 | 0.0            |     |                        |   |                     |   |                  |   |                        |    | 6.9  |
|                         |                                   | Girls  | 22.2                         | 25.0 | 0.0                    | 3.6  | 0.0               | 39.3 | 28.6               | 3.6 | 0.0            |     |                        |   |                     |   |                  |   |                        |    | 3.6  |
|                         |                                   | total  | 23.2                         | 26.8 | 0.0                    | 5.3  | 0.0               | 40.4 | 26.3               | 5.3 | 0.0            |     |                        |   |                     |   |                  |   |                        |    | 5.3  |
| Juan Uvera              | Aguiles Serdán n = 102            | Boys   | 5.6                          | 11.1 | 0.0                    | 1.5  | 2.8               | 41.7 | 5.6                | 1.5 | 2.8            |     |                        |   |                     |   |                  |   |                        |    | 2.8  |
|                         |                                   | Girls  | 7.2                          | 7.2  | 0.0                    | 5.6  | 1.4               | 23.2 | 8.7                | 1.4 | 0.0            |     |                        |   |                     |   |                  |   |                        |    | 1.5  |
|                         |                                   | total  | 6.7                          | 8.6  | 0.0                    | 2.9  | 1.9               | 29.5 | 7.6                | 1.9 | 0.0            |     |                        |   |                     |   |                  |   |                        |    | 1.9  |
| La Trinidad Tepango     | Alvaro Obregón n = 51             | Boys   | 3.2                          | 9.7  | 6.5                    | 9.7  | 9.7               | 12.9 | 6.5                | 3.2 | 0.0            |     |                        |   |                     |   |                  |   |                        |    | 3.2  |
|                         |                                   | Girls  | 5.0                          | 10.0 | 5.0                    | 15.0 | 10.0              | 5.0  | 10.5               | 5.3 | 0.0            |     |                        |   |                     |   |                  |   |                        |    | 0.0  |
|                         |                                   | total  | 3.9                          | 9.8  | 5.9                    | 11.8 | 9.8               | 9.8  | 8.0                | 4.0 | 0.0            |     |                        |   |                     |   |                  |   |                        |    | 2.0  |

Table 4. Cont.

| Localities             | Schools                  | Gender | <i>E. histolytica/dispar</i> |     | <i>G. intestinalis</i> |     | <i>B. hominis</i> |      | <i>F. hepatica</i> |     | <i>H. nana</i> |     | <i>A. lumbricoides</i> |     | <i>T. trichiura</i> |     | Ancylostomatidae |     | <i>E. vermicularis</i> |     |     |
|------------------------|--------------------------|--------|------------------------------|-----|------------------------|-----|-------------------|------|--------------------|-----|----------------|-----|------------------------|-----|---------------------|-----|------------------|-----|------------------------|-----|-----|
|                        |                          |        | %                            | %   | %                      | %   | %                 | %    | %                  | %   | %              | %   | %                      | %   | %                   | %   | %                | %   | %                      | %   | %*  |
| San Felipe Xonacayucan | Aquilés Serdán<br>n = 83 | Boys   | 7.4                          | 3.7 | 0.0                    | 3.6 | 0.0               | 11.1 | 3.7                | 0.0 | 0.0            | 0.0 | 0.0                    | 0.0 | 0.0                 | 0.0 | 0.0              | 0.0 | 0.0                    | 0.0 | 0.0 |
|                        |                          | Girls  | 3.8                          | 1.9 | 0.0                    | 3.6 | 0.0               | 3.8  | 17.0               | 3.8 | 0.0            | 0.0 | 0.0                    | 0.0 | 0.0                 | 0.0 | 0.0              | 0.0 | 0.0                    | 0.0 | 1.9 |
|                        |                          | total  | 5.0                          | 2.5 | 0.0                    | 3.6 | 0.0               | 15.0 | 3.8                | 0.0 | 0.0            | 0.0 | 0.0                    | 0.0 | 0.0                 | 0.0 | 0.0              | 0.0 | 0.0                    | 0.0 | 1.3 |
| TOTAL                  | n = 865                  | Boys   | 7.6                          | 7.1 | 1.3                    | 5.8 | 1.8               | 25.3 | 8.5                | 2.4 | 2.4            | 2.4 | 2.4                    | 2.4 | 2.4                 | 2.4 | 2.4              | 2.4 | 2.4                    | 2.4 | 4.0 |
|                        |                          | Girls  | 8.5                          | 8.0 | 0.7                    | 5.7 | 2.9               | 20.5 | 9.9                | 1.4 | 1.4            | 1.4 | 1.4                    | 1.4 | 1.4                 | 1.4 | 1.4              | 1.4 | 1.4                    | 1.4 | 2.2 |
|                        |                          | total  | 8.0                          | 7.5 | 1.0                    | 5.8 | 2.3               | 23.0 | 9.2                | 2.0 | 2.0            | 2.0 | 2.0                    | 2.0 | 2.0                 | 2.0 | 2.0              | 2.0 | 2.0                    | 2.0 | 3.1 |

\*Underestimating data due to the impossibility of using anal swabs for the detection of *E. vermicularis* eggs.  
doi:10.1371/journal.pntd.0002553.t004

noted in Table 4, and according to age in Table 5. Infections by *A. lumbricoides*, *T. trichiura*, *E. histolytica/E. dispar*, and *Giardia intestinalis* appeared to be the most prevalent. An expected slight decrease of their prevalences with age is seen, except in *A. lumbricoides* and *T. trichiura* which clearly peak at the 8–10-year-old group. Prevalence data of *E. vermicularis* may be considered underestimations, as anal swabs, the adequate technique for the detection of the eggs of this nematode species, could unfortunately not be used due of its methodological difficulties in field work.

Many *F. hepatica*-infected children were coinfecting by other parasites of the above mentioned species, mainly *A. lumbricoides* and *G. intestinalis* (Table 6). Combined coinfections were with up to four different parasites. Only six boys and four girls, among whom three girls shedding liver fluke eggs, showed no coinfection. The presence of *E. histolytica/dispar* (OR = 3.110, P = 0.010), *G. intestinalis* (OR = 3.230, P = 0.009), *B. hominis* (OR = 11.296, P = 0.001), *H. nana* (OR = 8.888, P < 0.001) and *A. lumbricoides* infection (OR = 3.929, P < 0.001) resulted in risk factors for *F. hepatica* infection. However, this was not the case of *T. trichiura* infection (OR 0.517, P = 0.310).

## Treatments

The post-treatment follow-up was made with faecal examinations by means of the three diagnostic techniques for up to two months. Of the 50 liver fluke infected children, only three (6.0%) were still intermittently shedding a low number of eggs after the first nitazoxanide treatment course (Table 7). None of these three children was anyway showing eggs in stools after the second treatment course administered one month after the first treatment. Interestingly, these three children were concomitantly infected by moderate burdens (moderate egg counts) of ascariasis.

Eosinophilia decreased to normal rates after treatment except in 7 children who only showed a long-term slow decrease and other four children who maintained relatively high levels for up to one year. One of the latter four was detected to re-start faecal egg shedding of both *F. hepatica* and *A. lumbricoides*, an increase of eosinophilia up to 37%, and anaemia. Adequately re-treated, the negativity was afterwards again verified in these four children by the three techniques.

Most of the children infected by intestinal protozoans and helminths could also be treated by nitazoxanide (Table 7). In the majority of cases, diagnostic techniques showed the disappearance of parasitic stages in stools two months after first treatment course application. Only a few children infected by *E. histolytica/dispar*, *G. intestinalis*, ancylostomids and *E. vermicularis* were in need for a second treatment course for total cleaning.

## Discussion

### Liver fluke infection

The overall prevalence of 5.8% and local prevalences ranging between 2.9% and 13.3% are the highest so far described not only in Mexico but also in the whole Central American region. The absence of significant differences between prevalences according to localities and the absence of any trend according to their geographical distribution, suggest that this endemic area may have homogeneous transmission and epidemiological characteristics. The Atlixco area may thus be catalogued as human fascioliasis mesoendemics [45]. However, the relatively high local prevalences in San Jerónimo Caleras (13.3%) and La Trinidad Tepango (11.8%) adds concern in front of the possibility for hyperendemic local situations. Field studies to assess whether different lymnaeid species and their spatial distribution may be related to the slightly

**Table 5.** Prevalences by intestinal protozoa and helminths found in the 865 schoolchildren surveyed in the Atlitxco municipality, Puebla, Mexico, according to age.

| Age groups           | <i>E. histolytica/dispar</i> |      | <i>G. intestinalis</i> |      | <i>B. hominis</i> |     | <i>F. hepatica</i> |      | <i>H. nana</i> |     | <i>A. lumbricoides</i> |      | <i>T. trichiura</i> |      | Ancylostomidae spp. |     | <i>E. vermicularis</i> |     |
|----------------------|------------------------------|------|------------------------|------|-------------------|-----|--------------------|------|----------------|-----|------------------------|------|---------------------|------|---------------------|-----|------------------------|-----|
|                      | No.                          | %    | No.                    | %    | No.               | %   | No.                | %    | No.            | %   | No.                    | %    | No.                 | %    | No.                 | %   | No.*                   | %*  |
| 6 years (n = 132)    | 16                           | 12.1 | 18                     | 13.7 | 1                 | 0.8 | 9                  | 6.8  | 3              | 2.3 | 28                     | 21.2 | 5                   | 3.8  | 8                   | 6.1 | 4                      | 3.0 |
| 7 years (n = 127)    | 8                            | 6.3  | 13                     | 10.2 | 0                 | 0.0 | 6                  | 4.7  | 5              | 3.9 | 22                     | 17.3 | 7                   | 5.5  | 1                   | 0.8 | 5                      | 4.0 |
| 8 years (n = 131)    | 9                            | 7.0  | 8                      | 6.1  | 1                 | 0.8 | 8                  | 6.1  | 7              | 5.3 | 22                     | 16.8 | 11                  | 8.5  | 5                   | 3.8 | 1                      | 0.8 |
| 9 years (n = 136)    | 11                           | 8.1  | 9                      | 6.6  | 1                 | 0.7 | 10                 | 7.4  | 2              | 1.5 | 40                     | 29.4 | 15                  | 11.0 | 2                   | 1.5 | 3                      | 2.2 |
| 10 years (n = 115)   | 7                            | 6.1  | 5                      | 4.3  | 2                 | 1.7 | 9                  | 7.8  | 2              | 1.7 | 24                     | 20.9 | 15                  | 13.0 | 0                   | 0.0 | 0                      | 0.0 |
| 11 years (n = 93)    | 6                            | 6.5  | 2                      | 2.2  | 1                 | 1.1 | 4                  | 4.3  | 1              | 1.1 | 29                     | 31.2 | 13                  | 14.0 | 0                   | 0.0 | 6                      | 6.5 |
| 12 years (n = 123)   | 12                           | 9.8  | 7                      | 5.7  | 3                 | 2.4 | 3                  | 2.4  | 0              | 0.0 | 31                     | 25.2 | 13                  | 10.8 | 1                   | 0.8 | 8                      | 6.5 |
| 13 years (n = 6)     | 0                            | 0.0  | 3                      | 50.0 | 0                 | 0.0 | 0                  | 0.0  | 0              | 0.0 | 2                      | 33.3 | 0                   | 0.0  | 0                   | 0.0 | 0                      | 0.0 |
| 14 years (n = 2)     |                              | 0.0  | 0                      | 0.0  | 0                 | 0.0 | 1                  | 50.0 | 0              | 0.0 | 1                      | 50.0 | 0                   | 0.0  | 0                   | 0.0 | 0                      | 0.0 |
| 6–14 years (n = 865) | 69                           | 8.0  | 65                     | 7.5  | 9                 | 1.0 | 50                 | 5.8  | 20             | 2.3 | 199                    | 23.0 | 79                  | 9.2  | 17                  | 2.0 | 27                     | 3.1 |

\*Underestimating data due to the impossibility of using anal swabs for the detection of *E. vermicularis* eggs.  
doi:10.1371/journal.pntd.0002553.t005

different local prevalences are in the way. The patchy distribution of fascioliasis as the consequence of the distribution of the water-linked populations of lymnaeid vectors is well known in other human endemic areas [12,46,47].

The difference in subject positivity when comparing results obtained with the coproantigen test (50 subjects, 5.78%) and the coprological Lumberas and Kato-Katz egg finding techniques (14 subjects, 1.62%) (Table 1) is too high as to conclude that it is only related to the fact that most children were still in the acute phase when surveyed. Other aspects which may be at the origin of this difference include the known low sensibility of the Lumberas and Kato-Katz techniques, the difficulty of egg finding in low burden infections, and the intermittence in egg shedding.

The low epg counts (24–384 epg) found suggest that (i) liver fluke burdens are generally low in this area, and (ii) eggs shed by children may be so scarce as to be easily overlooked. This remembers the diagnostic problems usually posed by egg absence in patients in Europe which are solved with serological tests.

Additionally, it should be considered that eggs in humans are known to follow a timely irregular appearance in stool samples [48], which in cases of low burdens may be more pronounced and give rise to egg overlooking when only analyzing one or a few microscopic preparations. These low burdens may be welcome, because it means that in general no special precaution will be needed for child treatment in that area due to epg always lower than 400 [32].

Prevalences by the coproantigen test according to gender do not show statistical differences, neither for the whole area nor after localities, although there is a somewhat higher rate in males than in females (56% vs 44%). Interestingly, the sex ratio of positive cases appears opposite by the egg finding techniques of Lumberas and Kato-Katz (42.8% vs 57.1%) (Table 1). Although the number of children shedding eggs was insufficient as to reach a significant conclusion, this agrees with results obtained in other human endemic areas where females shed more eggs than males [4].

**Table 6.** Prevalences by intestinal protozoa and helminths found in the 50 schoolchildren presenting fascioliasis among the total of children surveyed in the Atlitxco municipality, Puebla, Mexico, according to age.

| Age                 | <i>E. histolytica</i> |      | <i>G. intestinalis</i> |      | <i>B. hominis</i> |      | <i>H. nana</i> |      | <i>A. lumbricoides</i> |       | <i>T. trichiura</i> |      | Ancylostomidae spp. |      | <i>E. vermicularis</i> |      |
|---------------------|-----------------------|------|------------------------|------|-------------------|------|----------------|------|------------------------|-------|---------------------|------|---------------------|------|------------------------|------|
|                     | No.                   | %    | No.                    | %    | No.               | %    | No.            | %    | No.                    | %     | No.                 | %    | No.                 | %    | No.*                   | %*   |
| 6 years (n = 9)     | 2                     | 22.2 | 2                      | 22.2 | 1                 | 11.1 | 0              | 0.0  | 7                      | 77.8  | 1                   | 11.1 | 2                   | 22.2 | 2                      | 22.2 |
| 7 years (n = 6)     | 2                     | 33.3 | 2                      | 33.3 | 0                 | 0.0  | 1              | 16.7 | 3                      | 50.0  | 1                   | 16.7 | 0                   | 0.0  | 1                      | 16.7 |
| 8 years (n = 8)     | 1                     | 12.5 | 0                      | 0.0  | 0                 | 0.0  | 3              | 37.5 | 6                      | 75.0  | 0                   | 0.0  | 0                   | 0.0  | 0                      | 0.0  |
| 9 years (n = 10)    | 3                     | 30.0 | 2                      | 20.0 | 1                 | 10.0 | 0              | 0.0  | 4                      | 40.0  | 0                   | 0.0  | 1                   | 10.0 | 1                      | 10.0 |
| 10 years (n = 9)    | 0                     | 0.0  | 2                      | 22.2 | 1                 | 11.1 | 1              | 11.1 | 5                      | 55.6  | 2                   | 22.2 | 0                   | 0.0  | 0                      | 0.0  |
| 11 years (n = 4)    | 1                     | 25.0 | 1                      | 25.0 | 0                 | 0.0  | 0              | 0.0  | 1                      | 25.0  | 0                   | 0.0  | 0                   | 0.0  | 1                      | 25.0 |
| 12 years (n = 3)    | 0                     | 0.0  | 1                      | 33.3 | 1                 | 33.3 | 0              | 0.0  | 0                      | 0.0   | 0                   | 0.0  | 2                   | 22.2 | 0                      | 0.0  |
| 13 years (n = 0)    | -                     | -    | -                      | -    | -                 | -    | -              | -    | -                      | -     | -                   | -    | -                   | -    | -                      | -    |
| 14 years (n = 1)    | 0                     | 0.0  | 0                      | 0.0  | 0                 | 0.0  | 0              | 0.0  | 1                      | 100.0 | 0                   | 0.0  | 0                   | 0.0  | 0                      | 0.0  |
| 6–14 years (n = 50) | 9                     | 18.0 | 10                     | 20.0 | 4                 | 8.0  | 5              | 10.0 | 27                     | 54.0  | 4                   | 8.0  | 3                   | 6.0  | 5                      | 10.0 |

\*Underestimating data due to the impossibility of using anal swabs for the detection of *E. vermicularis* eggs.  
doi:10.1371/journal.pntd.0002553.t006

Prevalences by the coproantigen test according to age were 5.79% (15 positive among a total of 259 children studied), 7.06% (27 of 382), and 3.57% (8 of 224) in the 6–7, 8–10, and 11–14 year-old groups. These results are similar to those found in hyperendemic areas of Andean countries, where a peak in the 9–11 year-old age group is typical [4,5,49,50]. In spite of the evidence of the infection decrease in the 12–15 year-old age group, it should be considered that infection still occurs in adult subjects in such endemic areas, although at lower prevalence rates [4,7,49], and that fasciolid parasites are able to survive up to 13.5 years in humans [51]. Consequently, appropriate adult surveys in the localities presenting higher prevalences in children should be performed, and hospitals, medical centres and physicians of Atlixco municipality should be ready to diagnose adult patients presenting suspicious symptomatology.

In Atlixco, the first two human fascioliasis cases were already reported five decades ago [24]. Several additional cases of fascioliasis (0.6% of the subjects analyzed in hospitals) and infection by other helminths were described for the same area shortly after [52]. A few cases were sporadically diagnosed by duodenal exploration in the University Hospital of Puebla throughout the period from 1987 to 2004 [53]. Thus, it may be concluded that (i) human infection rates have increased in recent years, (ii) hygienic-health improvements have not been sufficient in the last five decades, and (iii) most of the human cases in Atlixco are overlooked. The majority of infected subjects of rural areas may not go to medical centers for diagnosis and misdiagnosis may sometimes occur due to insufficiently suggestive symptomatology. Both aspects have already been highlighted in other human fascioliasis endemic areas of Bolivia, Peru and Egypt [51]. Although prevalences and intensities are lower and temperatures higher, the Atlixco 1840-m-altitude area presents many epidemiological characteristics similar to those of the human hyperendemic area of the Northern Bolivian Altiplano at 3800–4100 m altitude, where lymnaeids inhabit permanent water collections maintained from thaw of snow and ice accumulated on the Eastern Andean mountain chain throughout the year [11,12,46].

In Mexico, although human infection appears also sporadically reported in recent years [54–59], various aspects clearly suggest that the disease should be considered a national health concern: (i) human cases have been reported from several states other than Puebla, such as Hidalgo, Mexico, Veracruz, Chiapas, Oaxaca, San Luis-Potosi, Jalisco and Morelos [23]; (ii) massively infected patients have been diagnosed [60]; (iii) children have been found to be infected in surveys in Chiapas [61] and Mexico city [62]; and (iv) several of the patients recently diagnosed in Canada and the United States were in fact immigrants from Mexico [63–67]. Prevalences and intensities found in the present study in Atlixco municipality are the highest so far recorded in the country and add thus concern about the possible level of human fascioliasis underestimation countrywide.

With regard to fascioliasis coinfections with other parasites, the effect of chronic infections by *G. intestinalis* and *A. lumbricoides* on the healthy growth, cognitive development, physical fitness, and iron status of children has already been described [68,69]. The presence of these parasites makes the analysis of fascioliasis impact on the child development difficult. Futures studies with bigger samples are in need for a correct assessment of the liver fluke impact.

### Food and drinking sources for liver fluke infection

Recent studies have shown that there are more human infection sources than the one traditionally noted, through free-living (= non-parasitic), encysted metacercariae attached to watercress.

The most important sources appear to be linked to vegetables and freshwater. With regard to vegetables, the following should be considered: (i) ingestion of wild freshwater plants; (ii) ingestion of cultivated freshwater plants; (iii) ingestion of wild terrestrial plants; (iv) ingestion of cultivated terrestrial plants; and (v) drinking of beverages made from local plants [9,70]. Regarding freshwater, three different sources should be taken into account: (i) drinking of contaminated water; (ii) ingestion of dishes and soups made with contaminated water; and (iii) washing of kitchen utensils or other objects with contaminated water [70].

Information obtained from the questionnaires indicates that fascioliasis risk is mainly related to consumption of watercress (Table 3). Watercress is traditionally consumed by the children inhabiting the Atlixco area in different ways, mainly as a watercress sandwich with potatoes (all children in the area who mentioned to consume this freshwater plant) and secondarily with different dressing such as lemon, vinegar or any other dressing. Most human reports in the world have been related to watercress. However, the general term watercress includes different aquatic species such as *Nasturtium officinale* (common watercress), *N. silvestris* and *Roripa amphibia* (wild watercress). Wild watercress has been reported as the main source of human infection in areas where fascioliasis in domestic animals is highly endemic [70].

The analysis of questionnaire responses show that, after watercress, fascioliasis risk appears linked to several vegetables which are usually eaten raw, such as radish, lettuce, corn cob, and spinach. Despite being terrestrial, the aforementioned local vegetables may increase the infection risk when washed with contaminated water [70] or cultivated using natural water for irrigation in places where water collections are inhabited by lymnaeids [71].

When considering the responses about water sources at home, a potential involvement of all other vegetables frequently consumed may not be ruled out. Additionally, given the lack of a treated water supply system reaching all dwellings, infection through drinking contaminated water, ingestion of dishes and soups made with contaminated water, and washing of kitchen utensils or other objects with contaminated water cannot be ruled out either. The relatively high coinfection percentage with *G. intestinalis* (20.0% in Atlixco – see Table 6) has already been used as a biomarker indicating high risk of fascioliasis infection by freshwater drinking, because of the significant positive association between *F. hepatica* and this protozoan [5,50].

Finally, a fascioliasis infection risk related to the drinking of alfalfa juice may neither be neglected. Indeed, it appears as frequent among dietary traditions of children from the Atlixco municipality (Table 3). Involvement of local beverages in human infection is known in areas as Cape Verde [70,72], and a probable role of alfalfa juice has been highlighted in Peru [73].

### Nitazoxanide treatment of fascioliasis

Nitazoxanide showed an efficacy of 94.0% and 100% after first and second treatment courses, respectively (Table 7). Such a parasitological cure rate is somewhat lower than the 97% obtained in Egyptian children [74] and higher than those obtained in children and adults combined in Egypt (82%) [75] and Peru (49.2%) [76]. Anyway, it should be considered that in Atlixco all liver fluke infections were mild (e.g., low epg) whereas in Peru and Egypt burdens use to be higher [5,7]. The aforementioned studies were nitazoxanide trials which included patients receiving 500 mg (adults) or 200 mg (children) morning and evening for 6 consecutive days in Egypt [74,75], and 100 mg (age range 2–3 years), 200 mg (age range 4–11 years) or 500 mg (age higher than 12 years) morning and evening for 7 consecutive days in Peru [76].

**Table 7.** Prevalences by intestinal protozoa and helminths found in the 865 schoolchildren surveyed in the Atlixco municipality, Puebla, Mexico, and results obtained in nitazoxanide treatments.

| Parasite species                    | Total positive subjects |      | Treated subjects followed |      | Negative after first treatment course |      | Negative after second treatment course |     |
|-------------------------------------|-------------------------|------|---------------------------|------|---------------------------------------|------|----------------------------------------|-----|
|                                     | No.                     | %    | No.                       | %    | No.                                   | %    | No.                                    | %   |
| <b>Protozoa:</b>                    |                         |      |                           |      |                                       |      |                                        |     |
| <i>Entamoeba histolytica/dispar</i> | 69                      | 8.0  | 61                        | 88.4 | 53                                    | 86.8 | 8                                      | 100 |
| <i>Giardia intestinalis</i>         | 65                      | 7.5  | 54                        | 83.0 | 50                                    | 92.6 | 4                                      | 100 |
| <i>Blastocystis hominis</i>         | 9                       | 1.0  | 3                         | 33.3 | 3                                     | 100  | -                                      | -   |
| <b>Helminths:</b>                   |                         |      |                           |      |                                       |      |                                        |     |
| <i>Fasciola hepatica</i>            | 50                      | 5.8  | 50                        | 100  | 47                                    | 94.0 | 3                                      | 100 |
| <i>Hymenolepis nana</i>             | 20                      | 2.3  | 12                        | 60.0 | 12                                    | 100  | -                                      | -   |
| <i>Ascaris lumbricoides</i>         | 199                     | 23.0 | 150                       | 75.3 | 150                                   | 100  | -                                      | -   |
| <i>Trichuris trichiura</i>          | 79                      | 9.2  | 73                        | 92.4 | 73                                    | 100  | -                                      | -   |
| <i>Ancylostomatidae</i>             | 17                      | 2.0  | 13                        | 76.4 | 0                                     | 0    | 13                                     | 100 |
| <i>Enterobius vermicularis</i> *    | 27                      | 3.1  | 21                        | 77.7 | 17                                    | 80.9 | 4                                      | 100 |

\*Underestimating data due to the impossibility of using anal swabs for the detection of *E. vermicularis* eggs.  
doi:10.1371/journal.pntd.0002553.t007

It should be emphasized that the only three children still intermittently shedding a low number of *Fasciola* eggs after the first nitazoxanide treatment course, were all of them concomitantly infected by moderate burdens (moderate egg counts) of ascariasis. This may suggest a possible interaction of these large size nematodes with the drug and/or its correct adsorption. Evidence from clinical studies on *A. lumbricoides* infection, primarily in children, shows that ascariasis can be responsible for decreased absorption of nutrients and that infected children may show jejunal mucosal abnormalities which revert to normal after deworming [77].

Treatment results obtained suggest that nitazoxanide may be considered, at least for the chronic stage of fascioliasis, a good alternative to triclabendazole, the drug of choice for human fascioliasis at present [32,78,79], mainly in countries where the latter is still not registered but nitazoxanide is since several years, as in Mexico. Nitazoxanide had demonstrated its efficacy against human fascioliasis in a few trials, in Egypt [74,75] and Peru [76]. However, differences in fasciolid susceptibility to nitazoxanide may exist depending on geographical strains. Thus, no response to nitazoxanide treatment was reported in 24 cases of liver fluke infection in Esmeralda, Camagüey, Cuba [80].

Moreover, its usefulness for the treatment of human cases not responding to triclabendazole [81] is of important additional value, given the spread of the resistance to this drug. However, it should be noted that a triclabendazole-resistant *F. hepatica* infected patient not responding to nitazoxanide treatment has recently been reported in the Netherlands [82]. In animals, triclabendazole resistance was first described in Australia [83], later in Ireland [84,85], Scotland [86], the Netherlands [87,88], and Spain [89]. Very recently it has also been found in southern Brazil [90] and Argentina [91]. Up to that moment, triclabendazole resistance only concerned livestock in animal endemic areas, but unfortunately it has very recently been also described in humans [92] in a human highly endemic area such as Cajamarca, Peru [6].

The strategies to minimize the development of resistance include the use of synergistic drug combinations [93], although this approach has the risk of building up multiple drug resistance [88]. Additionally, studies suggest that our understanding of the mechanism of resistance to triclabendazole remains far from complete [94–96], so that there is even a knowledge gap regarding its spreading capacity. It is evident that studies for alternative drugs for human use are in urgent need and nitazoxanide appears hence in the frontline.

### Intestinal protozooses and helminths and their treatment

With the exception of the two schools within Atlixco city (Tenextepc, Altavista), in which prevalences were lower, as expected due to its urban location, results of the remaining eight schools indicate that the rural area appears to be homogeneous, indicating a similar insufficiency of hygienic standards throughout.

Prevalence results obtained agree with previous reports indicating that Atlixco municipality should be recognized as one of the areas of the country most affected by intestinal parasitoses [52,97]. The relatively high infection rates by pathogens such as *G. intestinalis*, *A. lumbricoides* and *T. trichiura*, without forgetting potential *E. histolytica*, pose a public health problem with impact on child development. However, intensities only appear to be low, in contrast to other areas of Mexico where diseases such as hymenolepiasis, ascariasis and trichuriasis have been reported to reach levels of moderate to heavy burdens [41].

For protozooses, nitazoxanide showed high cure rates for all. In infections by *E. histolytica/dispar*, a second treatment course was needed for only a very few children (efficacy of 86.8%) (Table 7).

This result is very similar to the rates of 81%, 85% and 96% obtained in previous trials [41–43]. A similar efficacy (92.6%) was found in infections by *G. intestinalis*, which appears similar to the 94% obtained in Egypt [98], and higher than efficacies (71%, 69% and 64%) obtained in other studies [41–43]. The low giardiasis burdens found in Atlixco may explain our results. The maximum efficacy obtained against *B. hominis* with the first treatment course agrees with the very high efficacies (100%, 97%) already observed against this protozoan [41,43], as well as with its usefulness in cases of persistent diarrhea and enteritis associated with this parasite [99].

Similarly, the efficacy of this drug in treating the few hymenolepiasis cases in Atlixco agrees with results obtained in patients with low burdens by this cestode also in Mexico, such as 97% [41] and 95% [42], which are higher than those of 84% and 85% obtained with moderate burdens [41,98].

In both ascariasis and trichuriasis, the cure rates obtained were 100% already in the first treatment course (Table 7). Such a high efficacy was also obtained in ascariasis in previous assays [41,43] when concerning light infections (<2000 eggs/g). In trichuriasis, a 100% efficacy has also been previously obtained [43], but somewhat lower rates ranging between 78% and 89% have also been described [41,42,98]. In these two nematodiasis, nitazoxanide efficacy has been noted to decrease pronouncedly (down to 48% and 56%, respectively) in infections by moderate to heavy burdens (higher than 2000 eggs/g) [41]. The maximum cure rates obtained in ascariasis and trichuriasis in Atlixco are obviously related to the light burdens present.

With regard to the aforementioned helminthiasis, results of trials having demonstrated the usefulness of nitazoxanide as alternative to albendazole (the drug of choice for these helminthiasis), in Mexico [100] and also in a human fascioliasis endemic area of Peru [101], are worth mentioning.

In the case of ancylostomatids, all infected children were in need for a second treatment course (Table 7), which contrasts with the 96% cure rate obtained against *A. duodenale* infection in another trial [98]. Given the larval intraorganic migration and the relatively short patent period of 6–7 weeks of these nematodes, treatment failure may be related to tissue migrating larvae at the moment of treatment and perhaps also reinfection of children used to barefooted habits.

The cure rate of 80.9% obtained in oxyuriasis with the first treatment course is similar to the one (80%) already obtained in Mexico before [41], although somewhat lower than those (95%, 100%) found in other assays [43,98]. Anyway, the easy reinfections

in closed environments with soils highly contaminated by eggs (school rooms, family infections, etc.) as well as the selfinfection ways characteristic of this ageohelminthiasis, suggest that the treatment regime for nitazoxanide should not be different from the repeated treatment courses needed for oxyuriasis when applying other nematocides.

Synergistic associations of fascioliasis with other pathogens are believed to be at the base of the high morbidity and mortality rates of children in human fascioliasis hyperendemic areas [45], as the consequence of (i) the pathogenicity of the long-term advanced chronic stage of fascioliasis [15–17] and (ii) the immunosuppression induced by the liver fluke throughout the chronic phase [18]. The wide spectrum efficacy of nitazoxanide against fascioliasis and both intestinal protozooses and helminthiasis, its high parasitological cure rates, low cost, efficacy similar to albendazole, and usefulness against giardiasis make nitazoxanide a very useful drug for human fascioliasis endemic areas. Indeed, fascioliasis is characterized by presenting high rates of coinfection with other protozooses and helminthiasis, among which giardiasis, ascariasis and trichuriasis appear in the forefront [5,7,49,102]. Results obtained in the present study only highlight a potential problem in cases of massive infections by *A. lumbricoides* and *T. trichiura*, for which a somewhat longer treatment course may, in given cases, be applied after previous burden estimation by means of a quantitative diagnostic technique, such as Kato-Katz or any other [32].

## Supporting Information

**Checklist S1** STROBE (checklist). (DOC)

## Acknowledgments

Thanks are given to the city council of Atlixco for its collaboration and facilities provided for the two-year field work. Studies of this article have been performed within the framework of the Worldwide Initiative of WHO against Human Fascioliasis (WHO Headquarters, Geneva, Switzerland).

## Author Contributions

Conceived and designed the experiments: JLZR RRG SMC. Performed the experiments: JLZR RRG JSP YMT. Analyzed the data: JLZR RRG MAV SMC. Contributed reagents/materials/analysis tools: LRR. Wrote the paper: JLZR MAV SMC.

## References

- Mas-Coma S, Valero MA, Bargues MD (2009a) *Fasciola*, lymnaeids and human fascioliasis, with a global overview on disease transmission, epidemiology, evolutionary genetics, molecular epidemiology and control. *Adv Parasitol* 69: 41–146.
- Torgerson P, Claxton J (1999) *Epidemiology and control*. In: Dalton JP, ed. *Fasciolosis*. Wallingford, UK: CAB International Publishing, pp.113–149.
- Chen MG, Mott KE (1990) Progress in assessment of morbidity due to *Fasciola hepatica* infection: a review of recent literature. *Trop Dis Bull* 87: R1–R38.
- Esteban JG, Flores A, Angles R, Mas-Coma S (1999) High endemicity of human fascioliasis between Lake Titicaca and La Paz valley, Bolivia. *Trans Roy Soc Trop Med Hyg* 93: 151–156.
- Esteban JG, Gonzalez C, Bargues MD, Angles R, Sanchez C, et al. (2002) High fascioliasis infection in children linked to a man-made irrigation zone in Peru. *Trop Med Int Health* 7: 339–348.
- Gonzalez LC, Esteban JG, Bargues MD, Valero MA, Ortiz P, et al. (2011) Hyperendemic human fascioliasis in Andean valleys: An altitudinal transect analysis in children of Cajamarca province, Peru. *Acta Trop* 120: 119–129.
- Esteban JG, Gonzalez C, Curtale F, Muñoz-Antoli C, Valero MA, et al. (2003) Hyperendemic fascioliasis associated with schistosomiasis in villages in the Nile Delta of Egypt. *Amer J Trop Med Hyg* 69: 429–437.
- Moghaddam AS, Massoud J, Mahmoodi M, Mahvi AH, Periang MV, et al. (2004) Human and animal fascioliasis in Mazandaran province, northern Iran. *Parasitol Res* 94: 61–69.
- Ashrafi K, Valero MA, Massoud J, Sobhani AR, Solaymani-Mohammadi S, et al. (2006) Plant-borne human contamination by fascioliasis. *Amer J Trop Med Hyg* 75: 295–302.
- Valero MA, Perez-Crespo I, Periang MV, Khoubbane M, Mas-Coma S (2009) Fluke egg characteristics for the diagnosis of human and animal fascioliasis by *Fasciola hepatica* and *F. gigantica*. *Acta Trop* 111: 150–159.
- Mas-Coma S, Valero MA, Bargues MD (2009b) Climate change effects on trematodiasis, with emphasis on zoonotic fascioliasis and schistosomiasis. *Vet Parasitol* 163: 264–280.
- Fuentes MV, Valero MA, Bargues MD, Esteban JG, Angles R, et al. (1999) Analysis of climatic data and forecast indices for human fascioliasis at very high altitude. *Ann Trop Med Parasitol* 93: 835–850.
- Fuentes MV, Malone JB, Mas-Coma S (2001) Validation of a mapping and predicting model for human fascioliasis transmission in Andean very high altitude endemic areas using remote sensing data. *Acta Trop* 79: 87–95.
- Valero MA, Darce NA, Panova M, Mas-Coma S (2001) Relationships between host species and morphometric patterns in *Fasciola hepatica* adults and eggs from the Northern Bolivian Altiplano hyperendemic region. *Vet Parasitol* 102: 85–100.

15. Valero MA, Santana M, Morales M, Hernandez JL, Mas-Coma S (2003) Risk of gallstone disease in advanced chronic phase of fascioliasis: an experimental study in a rat model. *J Inf Dis* 188: 787–793.
16. Valero MA, Navarro M, Garcia-Bodelon MA, Marcilla A, Morales M, et al. (2006) High risk of bacterobilia in advanced experimental chronic fascioliasis. *Acta Trop* 100: 17–23.
17. Valero MA, Girones N, Garcia-Bodelon MA, Periago MV, Chico-Calero I, et al. (2008) Anemia in advanced chronic fascioliasis. *Acta Trop* 108: 35–43.
18. Girones N, Valero MA, Garcia-Bodelon MA, Chico-Calero MI, Punzon C, et al. (2007) Immune suppression in advanced chronic fascioliasis: an experimental study in a rat model. *J Inf Dis* 195: 1504–1512.
19. Hotez PJ, Molyneux DH, Fenwick A, Kumaresan J, Ehrlich Sachs S, et al. (2007) Control of neglected tropical diseases. *New Engl J Med* 357: 1018–1027.
20. Mas-Coma S (2011) The importance of emerging and re-emerging zoonotic diseases: recognition, monitoring and control. In: Odongo NE, Garcia MM, Viljoen GJ, ed. Sustainable Improvement of Animal Production and Health. Vienna and Roma: Joint FAO/IAEA Division of Nuclear Techniques in Food and Agriculture, Department of Nuclear Sciences and Applications. International Atomic Energy Agency and Food and Agriculture Organization of the United Nations: 277–284.
21. Bargues MD, Mas-Coma S (2005) Reviewing lymnaeid vectors of fascioliasis by ribosomal DNA sequence analyses. *J Helminthol* 79: 257–267.
22. Mas-Coma S, Funatsu IR, Bargues MD (2001) *Fasciola hepatica* and lymnaeid snails occurring at very high altitude in South America. *Parasitology* 123: S115–S127.
23. De Haro Arteaga I, Tay Zavala J, Bucio Torres MI, Gonzalez Angulo J (1986) Salud pública. In: Flores Crespo R, Quiroz Romero H, Ibarra Velarde F, ed. Fascioliasis. Volumen Conmemorativo del Centenario del Descubrimiento del Ciclo de *Fasciola hepatica* Thomas y Leuckart 1883. Palo Alto, México DF: Instituto Nacional de Investigaciones Forestales, Agrícolas y Pecuarias (INIFAP), Sector Pecuário. pp. 404–424.
24. Biagi F, Soto R, Dorantes S, Castrejón Velazco O, Portilla J (1957) Dos casos de fascioliasis en su periodo inicial como problema de diagnóstico. *Bol Méd Hosp Inf México* 14: 533–44.
25. Bargues MD, Artigas P, Mera y Sierra RL, Pointier JP, Mas-Coma S (2007) Characterisation of *Lymnaea cubensis*, *L. viatrix* and *L. neotropica* n. sp., the main vectors of *Fasciola hepatica* in Latin America, by analysis of their ribosomal and mitochondrial DNA. *Ann Trop Med Parasitol* 101: 621–641.
26. Bargues MD, Artigas P, Khoubbane M, Flores R, Glöer P, et al. (2011) *Lymnaea schirazensis*, an overlooked snail distorting fascioliasis data: genotype, phenotype, ecology, worldwide spread, susceptibility, applicability. *PLoS ONE* 6: e24567 (33 pp.+3 Suppl. Tables+5 Suppl. Figures).
27. Rojas-García R (2000) Estudio de las especies del género *Fossaria* Westerlund 1885 (Gastropoda: Pulmonata) de las cuencas Atoyac y Nexapa del Estado de Puebla. Tesis para la Obtención del Título de Biología, Laboratorio de Zoología de Invertebrados, Escuela de Biología, Benemérita Universidad Autónoma de Puebla, México, pp. 1–58.
28. Lumbreras H, Cantella R, Burga R (1962) Acerca de un procedimiento de sedimentación rápida para investigar huevos de *Fasciola hepatica* en las heces, su evaluación y uso en el campo. *Rev Méd Peruana* 31 (332): 167–174.
29. Espinoza JR, Maco V, Marcos L, Saez S, Gonzalez C, et al. (2007) Evaluation of Fas2-ELISA for the serological detection of *Fasciola hepatica* infection in humans. *Amer J Trop Med Hyg* 76: 977–982.
30. Mazzotti L, Bravo-Becherelle MA, Briseno C (1960) Presencia de *Ancylostoma duodenale* en varias regiones de México. *Rev Inst Salubr Enf Trop* 20 (3): 175–183.
31. Ash LR, Orihel TC, Savioli L (1994) Bench aids for the diagnosis of intestinal parasites. World Health Organization, Geneva.
32. World Health Organization (2007) Report of the WHO Informal Meeting on use of triclabendazole in fascioliasis control. World Health Organization, Headquarters Geneva, 17–18 October 2006: WHO/CDS/NTD/PCT/2007.1.
33. Espino AM, Marcet R, Finlay CM (1990) Detection of circulating excretory secretory antigens in human fascioliasis by sandwich enzyme-linked immunosorbent assay. *J Clin Microbiol* 28: 2637–2640.
34. Espino AM, Finlay CM (1994) Sandwich enzyme-linked immunosorbent assay for detection of excretory secretory antigens in humans with fascioliasis. *J Clin Microbiol* 32: 190–193.
35. Espino AM, Diaz A, Perez A, Finlay CM (1998) Dynamics of antigenemia and coproantigens during a human *Fasciola hepatica* outbreak. *J Clin Microbiol* 36: 2723–2726.
36. Millán JC, Mull R, Freise S, Richter J (2000) The efficacy and tolerability of triclabendazole in Cuban patients with latent and chronic *Fasciola hepatica* infection. *Amer J Trop Med Hyg* 63: 264–269.
37. Gilles HM, Hoffman PS (2002) Treatment of intestinal parasitic infections: a review of nitazoxanide. *Trends Parasitol* 18: 95–97.
38. Fox LM, Saravolatz D (2005) Nitazoxanide: a new thiazolide antiparasitic agent. *Clin Inf Dis* 40: 1173–1180.
39. Hemphill A, Mueller J, Esposito M (2006) Nitazoxanide, a broad-spectrum thiazolide anti-infective agent for the treatment of gastrointestinal infections. *Expert Opin Pharmacotherapy* 7: 953–964.
40. Aslam S, Musher DM (2007) Nitazoxanide: clinical studies of a broad-spectrum anti-infective agent. *Future Med Ser, Future Microbiol* 2: 583–590.
41. Romero Cabello R, Guerrero LR, Muñoz García MR, Geyne Cruz A (1997) Nitazoxanide for the treatment of intestinal protozoan and helminthic infections in Mexico. *Trans Roy Soc Trop Med Hyg* 91: 701–703.
42. Davila-Gutiérrez CE, Vasquez C, Trujillo-Hernandez B, Huerta M (2002) Nitazoxanide compared with quinifamide and mebendazole in the treatment of helminthic infections and intestinal protozoa in children. *Amer J Trop Med Hyg* 66: 251–254.
43. Diaz E, Mondragon J, Ramirez E, Bernal R (2003) Epidemiology and control of intestinal parasites with nitazoxanide in children in Mexico. *Amer J Trop Med Hyg* 68: 384–385.
44. Moon TD, Oberhelman RA (2005) Antiparasitic therapy in children. *Pediatr Clin N America* 52: 917–948.
45. Mas-Coma S, Bargues MD, Valero MA (2005) Fascioliasis and other plant-borne trematode zoonoses. *Int J Parasitol* 35: 1255–1278.
46. Mas-Coma S, Angles R, Esteban JG, Bargues MD, Buchon P, et al. (1999) The Northern Bolivian Altiplano: a region highly endemic for human fascioliasis. *Trop Med Int Health* 4: 454–467.
47. Bargues MD, Artigas P, Khoubbane M, Ortiz P, Naquira C., et al. (2012) Molecular characterisation of *Galba truncatula*, *Lymnaea neotropica* and *L. schirazensis* from Cajamarca, Peru and their potential role in transmission of human and animal fascioliasis. *Parasit Vector* 5: 174 (16 pp.).
48. El-Morshedy H, Shehab AY, Zaki A, Farag HF (2002) Intra-specimen and day-to-day variations of *Fasciola* eggs counts in human stools. *Eastern Mediterranean Health J* 8: 619–25.
49. Esteban JG, Flores A, Angles R, Strauss W, Aguirre C, et al. (1997a) A population-based coprological study of human fascioliasis in a hyperendemic area of the Bolivian Altiplano. *Trop Med Int Health* 2: 695–699.
50. Esteban JG, Flores A, Aguirre C, Strauss W, Angles R, et al. (1997b) Presence of very high prevalence and intensity of infection with *Fasciola hepatica* among Aymara children from the Northern Bolivian Altiplano. *Acta Trop* 66: 1–14.
51. Mas-Coma S (2005) Epidemiology of fascioliasis in human endemic areas. *J Helminthol* 79 (3): 207–216.
52. Biagi F, Portilla J, Tay J (1958) Observaciones sobre fascioliasis y otras helmintiasis humanas en Atlixco, Puebla. *Prensa Méd Mexicana* 23: 317–320.
53. Cruz-Lopez O, Muñoz Lopez A, Cruz-Lopez MC, Venegas Martínez J (2004) Fasciolosis hepática diagnosticada en fase de invasión. In: XVI Congreso Nacional de Parasitología (México, Oct. 2004), Memorias: 118–119.
54. Alvarez-Chacon R, Garcia-Rosales JJ, Cruz-Otero MC, Wong-Chio M, Cabrera-Bravo M, Gomez-Gomez JV, Gamez-Aranda V (1992) Fasciolosis en los niños. Estudio de 10 casos. *Bol Méd Hosp Inf México* 49: 365–371.
55. Sanchez Vega JT, Tay Zavala J, Salinas Velasco R, Ruiz Sanchez D, Ordoñez Martínez JJ, et al. (2001) Fasciolosis. Presentación de un caso y revisión acerca de esta trematodiosis. *Rev Mexicana Pediatr* 68: 17–20.
56. Martínez-Bebert K, Roldríguez-Baez R, Pila-Perez R, Pila-Perez R, Tamakloe K (2002) Hematoma hepático por fascioliasis. *Gac Méd México* 138: 271–274.
57. Nieto Ocampo AE, Ibañez Fuentes JR, Coronado Miramontes R, García Chavarria G, et al. (2002) *Fasciola hepatica*: informe de un paciente. *Cirujano General* 24: 229–231.
58. Cruz-Lopez O, Pimentel AA, Tamariz Cruz OJ, Muñoz-Lopez A, Cruz-Lopez MC, et al. (2006) Fasciolosis hepática diagnosticada en fase de estado. *Rev Gastroenterol Mexicana* 71: 59–62.
59. Vazquez-Elizondo G, Zavala-García C, Elizondo J, Lizardi-Cervera J (2007) Infestación por *Fasciola hepatica* en la vía biliar. *Médica Sur, México* 14: 26–30.
60. Sanchez-Sosa S, Rojas-Ortega S, Reed-San Roman G, Torres-Santana MA (2000) Fascioliasis hepatobiliar masiva. *Rev Gastroenterol Mexicana* 65: 179–183.
61. Martínez-Barbabosa I (1975) Informe de Actividades Grupo Seroepidemiología. Etapa Preliminar. Centro de Investigaciones Ecológicas del Sureste. San Cristóbal de Las Casas, Chiapas. México.
62. Martínez-Barbabosa I, Gutierrez-Quiroz M, Romero-Cabello R, Ruiz-Gonzalez L, Gutierrez-Cardenas EM, et al. (2006) Seroepidemiology of fascioliasis in school children in Mexico City. *Rev Biomed* 17: 251–257.
63. Cheung J, Enns R, Romney M, Reynolds S, Amar J (2005) Biliary fascioliasis. *Gastroint Endoscopy* 61: 596–597.
64. Morse A, McClean K, Bedi A (2006) Hepatic fascioliasis complicated by hepatic cyst in communication with the biliary tree and secondary sclerosing cholangitis. *Amer J Gastroenterol* 101 (S2), Abstracts, 952: 378.
65. Channabasappa S, Vettiankall G, Riles W, Attar BM (2006) An unusual case of biliary colic... It's not always a stone! *Amer J Gastroenterol* 101 (S2), Abstracts, 792: 319.
66. Fullerton JK, Vitale M, Vitale GC (2006) Therapeutic endoscopic retrograde cholangiopancreatography for the treatment of *Fasciola hepatica* presenting as biliary obstruction. *Surgical Innovation* 13: 179–182.
67. Alatoom A, Sheffield J, Gander RM, Shaw J, Cavuoti D (2008) Fascioliasis in pregnancy. *Obstetrics Gynecol* 112 (2 Pt 2): 483–485.
68. Ali SA, Hill DR (2003) *Giardia intestinalis*. *Curr Opin Inf Dis* 16: 453–460.
69. Albonico M, Allen H, Chitsulo L, Engels D, Gabrielli AF, Savioli L (2008) Controlling soil-transmitted helminthiasis in pre-school-age children through preventive chemotherapy. *PLoS Negl Trop Dis* 2: e126.
70. Mas-Coma S (2004) Human fascioliasis. In: Cotruvo JA, Dufour A, Rees G, Bartram J, Carr R, et al., ed. World Health Organization (WHO), Waterborne Zoonoses: Identification, Causes and Control. London, UK: IWA Publishing. pp. 305–322.

71. Curtale F, Mas-Coma S, Hassancin YAEW, Barduagni P, Pezzotti P, et al. (2003) Clinical signs and household characteristics associated with human fascioliasis among rural population in Egypt: a case-control study. *Parasitologia* 45: 5–11.
72. World Health Organization (1995) Control of foodborne trematode infections. Geneva, Switzerland: World Health Organization, WHO Techn Rep Ser No.849: 1–157.
73. Blancas G, Terashima A, Maguiña C, Lujan L, Alvarez H, et al. (2004) Fasciolosis humana y compromiso gastrointestinal: estudio de 277 pacientes en el Hospital Nacional Cayetano Heredia, 1970–2002. *Rev Gastroenterol Perú* 24: 143–157.
74. Kabil SM, El Ashry E, Ashraf NK (2000) An open-label clinical study of nitazoxanide in the treatment of human fascioliasis. *Curr Therap Res* 61: 339–345.
75. Rossignol JF, Abaza H, Friedman H (1998) Successful treatment of human fascioliasis with nitazoxanide. *Trans Roy Soc Trop Med Hyg* 92: 103–104.
76. Favennec L, Jave Ortiz J, Gargala G, Lopez Chegne N, Ayoub A, et al. (2003) Double blind, randomized, placebo-controlled study of nitazoxanide in the treatment of fascioliasis in adults and children from northern Peru. *Alim Pharmacol Therap* 17: 265–270.
77. Stephenson LS (1987) The impact of helminth infection on human nutrition. Philadelphia, USA: Taylor & Francis Inc. 233 pp.
78. Savioli L, Chitsulo L, Montresor A (1999) New opportunities for the control of fascioliasis. *Bull WHO* 77: 300.
79. Keiser J, Utzinger J (2004) Chemotherapy for major food-borne trematodes: a review. *Expert Opin Pharmacotherapy* 5: 1711–1726.
80. Del Risco Barrios U, Vazquez Drake CT, Garcia Gonzalez G, Sanchen Casa A (2001) Evaluación de la excreción de huevos de *Fasciola hepatica* por tres esquemas terapéuticos. *Rev Electr “Archivo Médico de Camagüey”*, 5 (4): 4 pp.
81. Gargala G, Abboud P, Borsa-Lebas F, Courchay E, Koning E, et al. (2005) Case report of successful treatment of triclabendazole resistant fascioliasis by nitazoxanide. In: *Medicine and Health in the Tropics (XVIIth International Congress for Tropical Medicine and Malaria, Marseille, France, 11–15 Sept. 2005)*, Abstract Book, P680: 283.
82. Winkelhagen AJS, Mank T, de Vries PJ, Soetekouw R (2012) Apparent Triclabendazole-resistant human *Fasciola hepatica* infection, the Netherlands. *Emerg Inf Dis* 18: 1028–1029.
83. Overend DJ, Bowen FL (1995) Resistance of *Fasciola hepatica* to triclabendazole. *Austral Vet J* 72: 275–276.
84. Lane G (1998) Anthelmintic resistance. *Vet Rec* 143: 332.
85. O'Brien DJ (1998) Fasciolosis: a threat to livestock. *Irish Vet J* 51: 539–541.
86. Mitchell GB, Maris L, Bonniwell MA (1998) Triclabendazole-resistant liver fluke in Scottish sheep. *Vet Rec* 143: 399.
87. Moll L, Gaasenbeek CPH, Vellema P, Borgsteede FHM (2000) Resistance of *Fasciola hepatica* against triclabendazole in cattle and sheep in the Netherlands. *Vet Rec* 91: 153–158.
88. Gaasenbeek CPH, Moll L, Cornelissen JBWJ, Vellema P, Borgsteede FHM (2001) An experimental study on triclabendazole resistance of *Fasciola hepatica* in sheep. *Vet Parasitol* 95: 37–43.
89. Alvarez-Sanchez MA, Mainar-Jaime RC, Perez-García J, Rojo-Vazquez FA (2006) Resistance of *Fasciola hepatica* to triclabendazole and albendazole in sheep in Spain. *Vet Rec* 159: 424–425.
90. Oliveira DR, Ferreira DM, Stival CC, Romero F, Cavagnoli F, et al. (2008) Triclabendazole resistance involving *Fasciola hepatica* in sheep and goats during an outbreak in Almirante Tamandare, Parana, Brazil. *Rev Bras Parasitol Vet* 17 (Supl. 1): 149–153.
91. Olaechea F, Lovera V, Larroza M, Raffo F, Cabrera R (2011) Resistance of *Fasciola hepatica* against Triclabendazole in cattle in Patagonia (Argentina). *Vet Parasitol* 178 (3/4): 364–366.
92. Ortiz P, Scarcella S, Cerna C, Rosales C, Cabrera M, Guzman M, Lamenza P, Solana H (2013) Resistance of *Fasciola hepatica* against Triclabendazole in cattle in Cajamarca (Peru): A clinical trial and in vivo efficacy test in sheep. *Vet Parasitol*: <http://dx.doi.org/10.1016/j.vetpar.2013.01.001>
93. Fairweather I, Boray JC (1999) Fasciolicides: efficacy, action, resistance and its management. *Vet J* 158: 81–112.
94. Fairweather I (2005) Triclabendazole: new skills to unravel an old-ish enigma. *J Helminthol* 79: 227–234.
95. Fairweather I (2009) Triclabendazole progress report, 2005–2009: an advancement of learning? *J Helminthol* 83: 139–150.
96. Brennan GP, Fairweather I, Trudgett A, Hoey E, Mc Coy M, et al. (2007) Understanding triclabendazole resistance. *Exper Mol Pathol* 82: 104–109
97. Cruz LA, Cortez RR, De Ita CF (1987) Parasitosis intestinales en el Estado de Puebla. *Rev Cienc Nat Apl, Elementos* 2 (12): 25–35.
98. Abaza H, El-Zayadi A, Kabil SM, Rizk (1998) Nitazoxanide in the treatment of patients with intestinal protozoan and helminthic infections: a report on 546 patients in Egypt. *Curr Therap Res* 59: 116–121.
99. Rossignol JF, Kabil SM, Said M, Samir H, Younis AM (2006) Effect of nitazoxanide in persistent diarrhea and enteritis associated with *Blastocystis hominis*. *Clin Gastroenterol Hepatol* 3: 987–991.
100. Belkind-Valdovinos U, Belkind-Gerson J, Sanchez-Francia D, Eespinoza-Ruiz MM, Lazcano-Ponce E (2004) Nitazoxanide vs albendazole against intestinal parasites in a single dose and for three days. *Salud Públ México* 46: 333–340.
101. Jave-Ortiz J, Lopez Chegne N, Gargala G, Favennec L (2002) Comparative clinical studies of nitazoxanide, albendazole and praziquantel in the treatment of ascariasis, trichuriasis and hymenolepiasis in children from Peru. *Trans Roy Soc Trop Med Hyg* 96: 193–196.
102. Flores A, Esteban JG, Angles R, Mas-Coma S (2000) Soil-transmitted helminth infections at very high altitude in Bolivia. *Trans Roy Soc Trop Med Hyg* 95: 272–277.
